# Supplementary material for: A thiadiazole-based covalent triazine framework nanosheet for highly selective and sensitive primary aromatic amine detection among various amines
Source: Royal Society of Chemistry journal article supplement (doi:10.1039/c9ta14252e), 2020-01-01
Supplement: c9ta14252e1.pdf [file c9ta14252e1.pdf]

Electronic Supplementary Information for

# Thiadiazole-Based Covalent Triazine Framework Nanosheet for Highly Selective and Sensitive Primary Aromatic Amines Detection among Various Amines

*Yuanzhe Tang,<sup>a,b</sup> Hongliang Huang,<sup>\*a,b</sup> Ben Peng,<sup>a,b</sup> Yanjiao Chang,<sup>a,b</sup> Yang Li<sup>a,b</sup> and  
Chongli Zhong<sup>\*a,b,c</sup>*

<sup>a</sup> State Key Laboratory of Separation Membranes and Membrane Processes, Tiangong  
University, Tianjin 300387, China

<sup>b</sup> School of Chemistry and Chemical Engineering, Tiangong University, Tianjin  
300387, China.

<sup>c</sup> College of Chemical Engineering, Beijing University of  
Chemical Technology, Beijing 100029, China

E-mail: [huanghongliang@tiangong.edu.cn](mailto:huanghongliang@tiangong.edu.cn), [zhongchongli@tiangong.edu.cn](mailto:zhongchongli@tiangong.edu.cn)

## Experimental section

### Materials

The various organic amines, cesium carbonate ( $\text{Cs}_2\text{CO}_3$ ), potassium carbonate ( $\text{K}_2\text{CO}_3$ ),  $\text{LiN}(\text{SiMe}_3)_2$ , benzene-1,4-dicarbonitrile, 4-formylphenylboronic acid, tetrakis(triphenylphosphine)palladium  $\text{Pd}(\text{PPh}_3)_4$  and 4,7-Dibromobenzo[c][1,2,5]thiadiazole were purchased from Energy Chemical Co. Ltd. Hydrochloric acid (HCl) and acetone were purchased from Beijing Chemical Works. Dimethyl sulfoxide (DMSO), diethyl ether ( $\text{Et}_2\text{O}$ ), ethanol (EtOH), methanol (MeOH), dichloromethane (DCM), N, N-Dimethylformamide (DMF) and Tetrahydrofuran (THF) were purchased from Sinopharm Chemical Reagent Co. Ltd.

### Equipment

FT-IR Spectra were collected on a FT-IR spectrometer equipped with an ATR attachment (TENSOR II, Bruker, Germany) over the wavenumber range of 400-4000  $\text{cm}^{-1}$ .  $^1\text{H}$  Nuclear magnetic resonance (NMR) spectra were measured on a Bruker AVANCE III 400M spectrometer. Solid-state  $^{13}\text{C}$ -NMR spectra were recorded at room temperature on a Bruker Fourier 300 M spectrometer. X-ray photoelectron spectroscopy (XPS) was measured on a Thermofisher K-alpha XPS spectrometer. High resolution transmission electron microscopy (HR-TEM) micrographs were recorded on JEM-2100F (JEOL, Japan). Atomic-force microscopy (AFM) images were collected by a scanning probe microscope (Bruker Dimension ICON, USA). The pore properties of the samples were measured by  $\text{N}_2$  adsorption and desorption at 77 K using ASAP 2020 Plus HD88. Thermogravimetric analysis (TGA) data were obtained by using a NETZSCH TG 209 F3 Tarsus analyzer with a heating rate of 10  $^\circ\text{C min}^{-1}$  under  $\text{N}_2$  atmosphere. Fluorescence spectra data were recorded on an F-7000 Fluorescence spectrophotometer equipped with a xenon lamp and quartz carrier. Fluorescence decay curves and fluorescent absolute quantum yield of the samples were measured at ambient temperature using an Edinburgh FLS 980 spectrometer

(Edinburgh Instruments, UK). UV-vis spectra were obtained with a UV-2600 spectrophotometer in the range of 250–800 nm at room temperature. Powder X-ray diffraction data (PXRD) analysis of powders were recorded on a SHIMADZU XRD-6000-X-ray diffractometer in reflection mode using Cu K $\alpha$  radiation ( $\lambda=1.5406$  Å). The  $2\theta$  range from  $1^\circ$  to  $50^\circ$  was scanned with a step size of  $0.01^\circ$ . UV-vis spectra were recorded on a Shimadzu UV-2600 spectrometer.

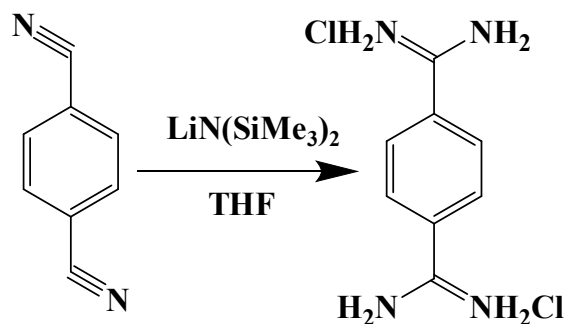

**Scheme S1.** Synthetic procedure for PAHC monomer.

**Synthesis of phenamidine hydrochloride (PAHC).** PAHC monomer was synthesized according to the published literatures<sup>1,2</sup> To a 1000 mL single-necked, round-bottomed flask, benzene-1,4-dicarbonitrile (6.4 g, 50.0 mmol) and THF (100 mL) were added, which was degassed with three freeze-vacuum-thaw cycles in N<sub>2</sub>. LiN(SiMe<sub>3</sub>)<sub>2</sub> solution (1M, 200 mL) was added dropwise in the mixture within 30 min at ice-water bath. The mixture was stirred at room temperature for 3 h and then cooled to 0 °C. Then HCl–EtOH mixture (6M, 200 mL) was carefully added the reaction system. After standing overnight, the white precipitate was filtered, washed with Et<sub>2</sub>O, and then recrystallized from H<sub>2</sub>O–EtOH mixture. Yield: (2.26 g, 96%).

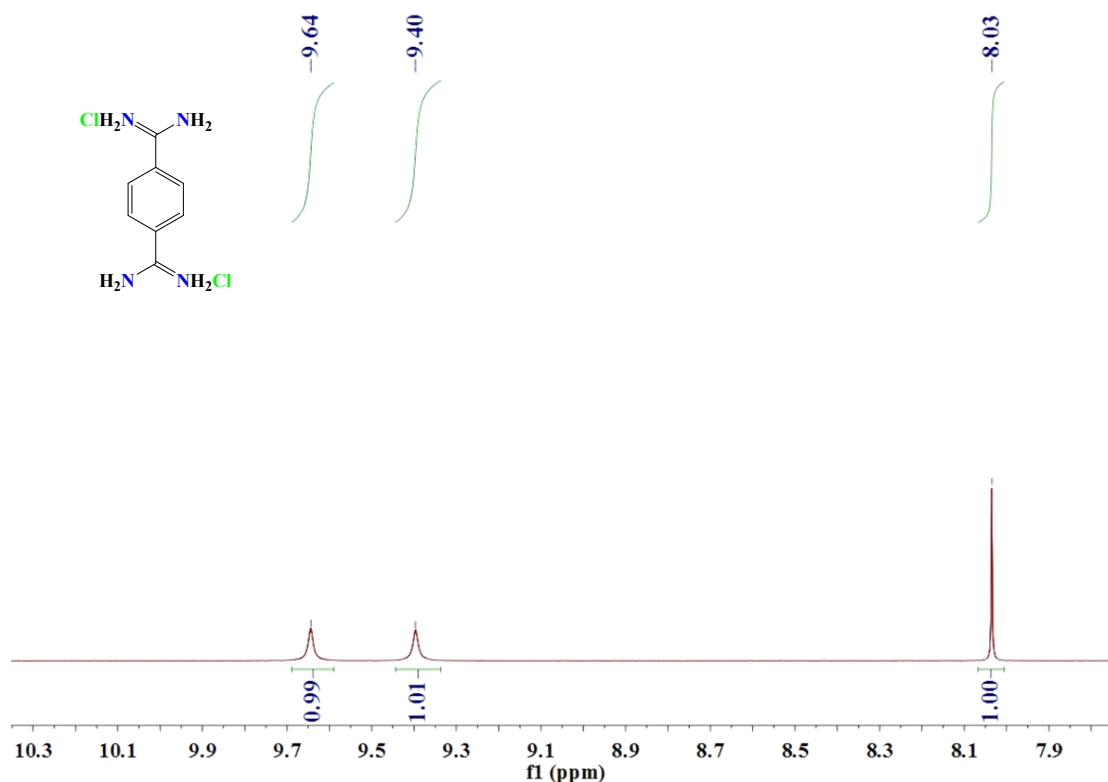

Fig. S1  $^1\text{H-NMR}$  of PAHC monomer.

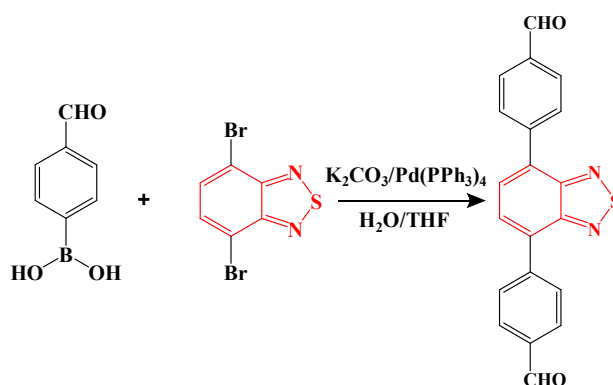

Scheme S2. Synthetic procedure for BTDD monomer.

### Synthesis of 4, 4'-(benzothiadiazole-4,7-diyl)dibenzaldehyde (BTDD).

To a 1000 mL three-necked, round-bottomed flask, 4,7-dibromo-2,1,3-benzothiadiazole (17 mmol, 5g), 4-formylphenylboronic acid (51 mmol, 7.65 g),  $\text{K}_2\text{CO}_3$  (100 mmol, 13.9g),  $\text{H}_2\text{O}$  (50 mL), THF (600 mL), and  $\text{Pd}(\text{PPh}_3)_4$  (0.12 g) was added. Under the protection of nitrogen, the suspension was reacted with stirring at reflux for 48 h. The organic solvent was evaporated on rotary evaporator. After that,

the crude product was extracted with DCM. The organic phase was dried with  $\text{MgSO}_4$ . After removed the DCM solvent, the crude product was column chromatographed over silica gel using pure dichloromethane to the product as yellow solid. (5.18 g, 88% yield).

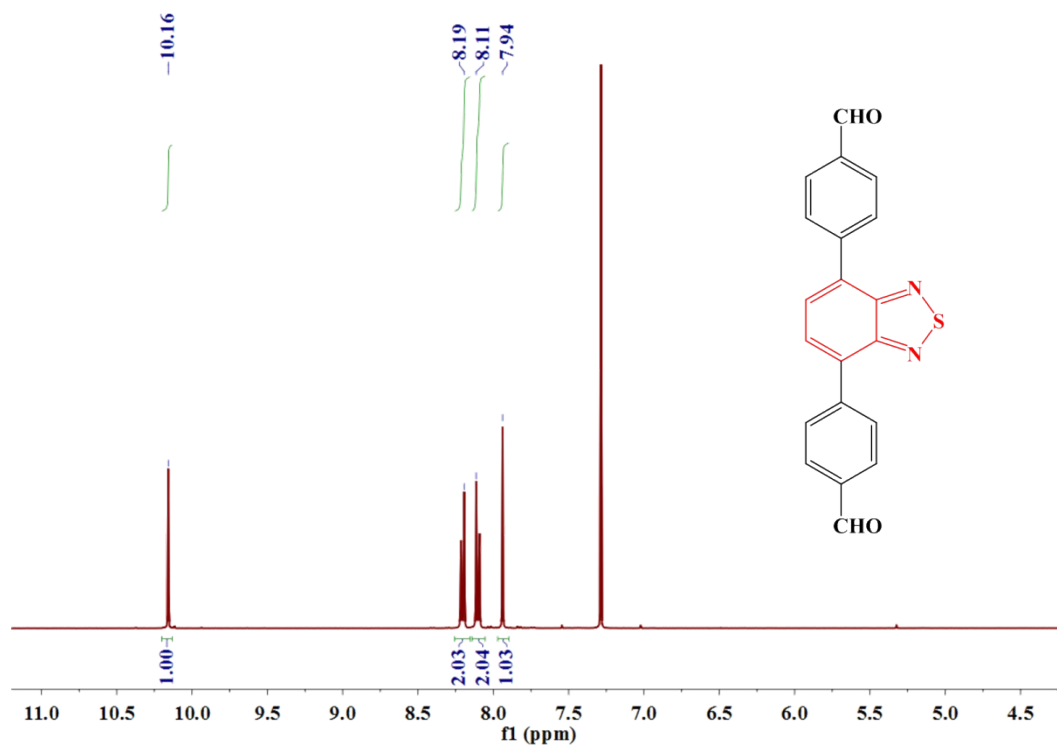

Fig. S2  $^1\text{H-NMR}$  of BTDD monomer.

**Synthesis of F-CTF-3.** In a 100 mL single-necked, round-bottomed flask, BTDD (172 mg, 0.5 mmol), PAHC (235.2 mg, 1.0 mmol), and cesium carbonate (716.8 mg, 2.2 mmol), DMSO (50 mL) and  $\text{H}_2\text{O}$  (2 mL) were added. The mixture was heated at 60 °C for 12 h, then heated at 80 °C, 100 °C for 12 h and 120 °C for 3 days to yield a yellow solid. The resulting solid was washed with dilute HCl ( $3 \times 100$  mL), water ( $3 \times 100$  mL), acetone ( $3 \times 100$  mL), and THF ( $3 \times 100$  mL), the obtained yellow solid was dried at 80 °C under vacuum for 12 h. (374.6 mg, 92% yield).

#### Fluorescence detection.

In a typical fluorescence detection experiment, 10 mg of F-CTF-3 sample was weighed, finely grounded, and then added to a cuvette containing 20 mL of deionized water under stirring. The fluorescence upon excitation at 372 nm of 2 ml F-CTF-3

suspension was measured in situ after increased addition of freshly prepared analyte solutions (3 mM, 20  $\mu$ L addition each time). The mixed solution was stirred about 10 s to maintain its homogeneity and then the emission spectra were recorded at the excitation wavelength of 372 nm.

Similarly, in a selective detection experiment, 10 mg finely grounded F-CTF-3 sample was added to a cuvette containing 20 mL of deionized water under stirring. Fluorescence of the obtained 2 ml F-CTF-3 suspension was recorded. Then, 3 mM PAAs and saturated non-PAA amines aqueous solutions were alternatively introduced (twice for each) into the suspension in such a sequence (In the case of PA-TPA): TPA (20  $\mu$ L), etc., the process was repeated until the total volume of added analytes solutions reached 200  $\mu$ L. After each addition, the fluorescence of the suspension was monitored.

In addition, in a time-depended detection experiment, 10 mg finely grounded F-CTF-3 was added into a cuvette containing 20 mL of deionized water under stirring. Fluorescence of the obtained 2 ml F-CTF-3 suspension was recorded. Then, PAAs (20  $\mu$ L) was added into the F-CTF-3 suspension and the mixture was shaken for a certain time before emission spectra measurements. For each point-in-time, the fluorescence intensity of the F-CTF-3 suspension was monitored.

### **Limit of detection (LOD) calculation**

Combined the standard deviation ( $S_b$ ) of fluorescence intensity detected in water for 20 times and the  $K_{sv}$  value calculated by Stern - Volmer (SV) equation, the LOD value was calculated by the following equation. <sup>[1,3,4]</sup>

$$S_b = \sqrt{\frac{\sum \left(1 - \frac{I_0}{I_1}\right)^2}{N - 1}} \quad (N = 20)$$

$$LOD = \frac{3S_b}{K_{SV}}$$

where  $S_b$  is the standard deviation for replicating detections of blank F-CTF-3 solutions;  $I_0$  is the fluorescence intensity of F-CTF-3 in water;  $I_1$  is the average of the  $I_0$ .

**Regeneration of F-CTF-3.** The F-CTF-3 used in detection measurements were collected and washed with DMF and acetone through stirring at room temperature for 12 h. This procedure was repeated at least three times by using fresh DMF and acetone. After filtration, the regenerated product was dried under vacuum at 333 K for 4 h to remove the residual solvents.

#### **Dynamic/static quenching of F-CTF-3.**

To investigate the quenching process between F-CTF-3 and the analyte, the nature of the quenching mechanism was explored using the Stern–Volmer (SV) equation:<sup>5</sup>

$$\frac{I_0}{I} = 1 + K_{sv}[Q] = 1 + K_q\tau_0[Q]$$

where  $I_0$  and  $I$  are the fluorescence emission intensities of the F-CTF-3 in the absence and presence of the analyte;  $[Q]$  is the concentration of analyte;  $\tau_0$  is the average life of F-CTF-3 with the value about 1.67 ns;  $K_q$  is the rate constant in the process of double molecules quenching;  $K_{sv}$  is the dynamic quenching constant.

When  $K_q < 2.0 \times 10^{10}$  mol/s, it can be determined that the quenching process is dynamic quenching;

When  $K_q > 2.0 \times 10^{10}$  mol/s, the quenching process is the static quenching one.

#### **Binding constants and stoichiometry**

The binding constant ( $K_b$ ) and the corresponding stoichiometry ( $n$ ) were calculated

for each interaction between F-CTF-3 and analyte using the following equation<sup>6</sup>:

$$\log\left(\frac{I_0 - I}{I}\right) = \log K_b + n \log [Q]$$

where  $I_0$  and  $I$  are the fluorescence intensities of the F-CTF-3 in the absence and presence of different concentrations of analyte, respectively;  $[Q]$  is the concentration of the respective analyte;  $K_b$  is the binding constant and  $n$  is the stoichiometry of binding.

#### **Adsorption kinetic experiment.**

After pre-degassing F-CTF-3 sample (10 mg) was totally activated and then transferred into water PAA solutions with different schedule times in a vial, respectively. UV-vis spectra of the solutions were recorded to characterize the adsorption performances of F-CTF-3 along with the soaking time at 298 K. The amount of the PAAs adsorbed on the F-CTF-3 was calculated using the following equation:

$$Q_e = \frac{(C_0 - C_e)V}{M}$$

Where  $Q_e$  ( $\text{mM g}^{-1}$ ) is the equilibrium adsorbed amount;  $C_0$  and  $C_e$  ( $\text{mM}$ ) are the initial and equilibrium concentrations of solution;  $V$  (L) is the volume of solution; and  $M$  (g) is the mass of F-CTF-3.



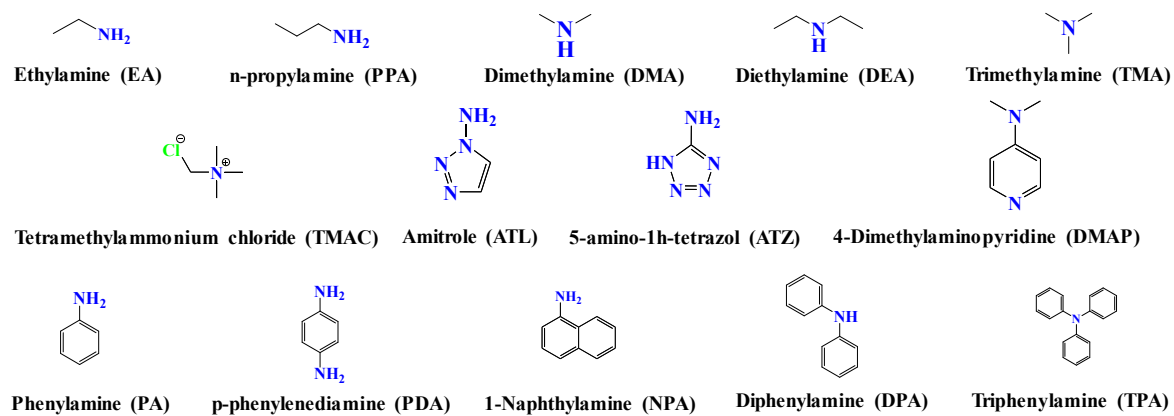

Fig. S3 Molecular structures of the various organic amines.

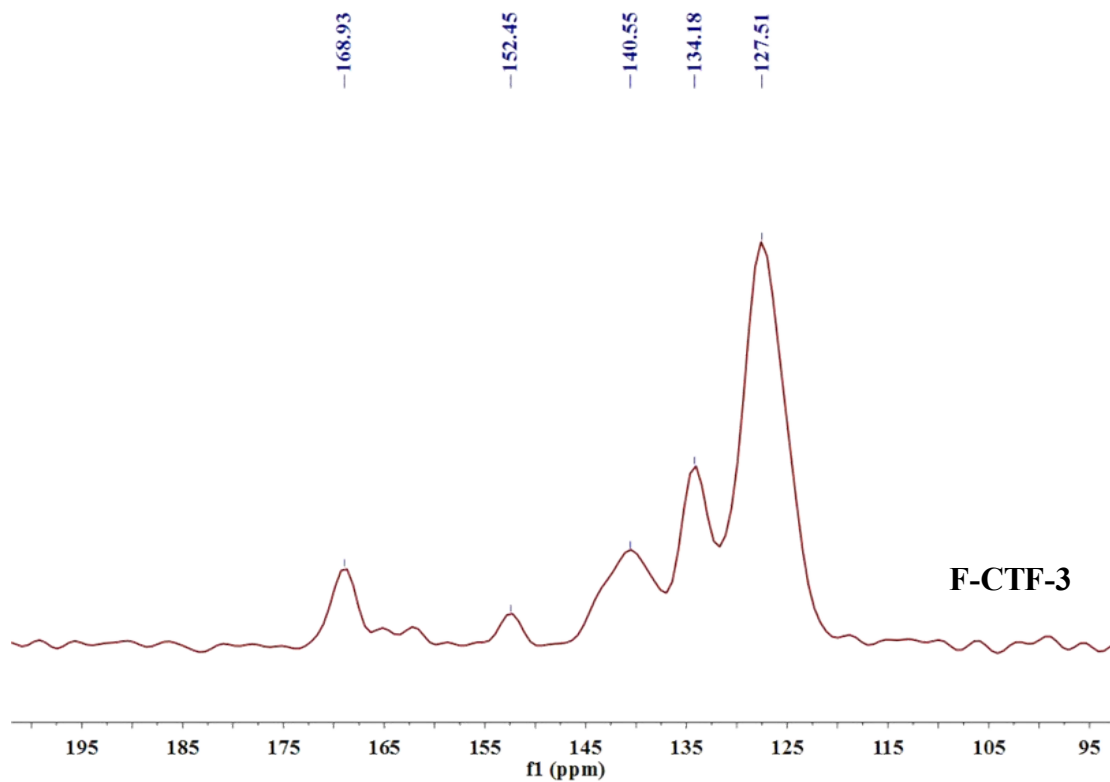

Fig. S4  $^{13}\text{C}$ -CPMAS solid-state NMR spectra of F-CTF-3.

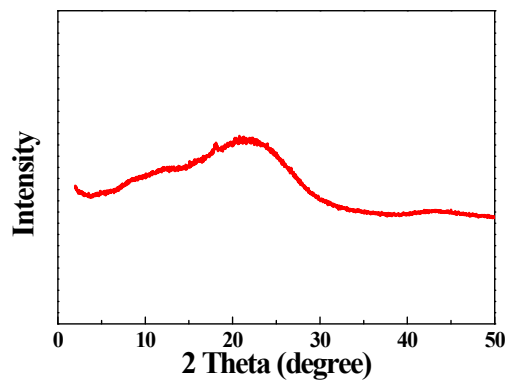

Fig. S5 XRD patterns of F-CTF-3.

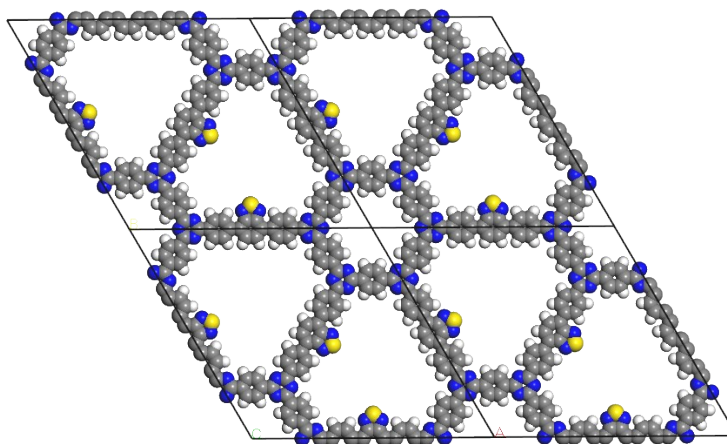

Fig. S6 Simulated AA stacking model structure of F-CTF-3 by Material Studios.

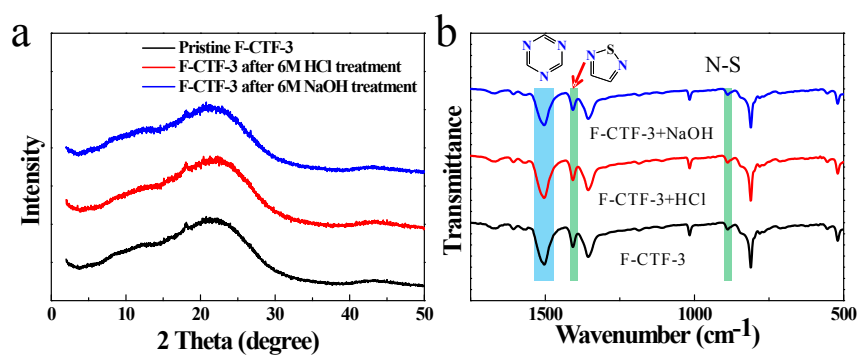

Fig. S7 (a) XRD patterns and (b) FT-IR spectra of F-CTF-3 before and after treated in NaOH (6M) and HCl (6M) aqueous solution, respectively.

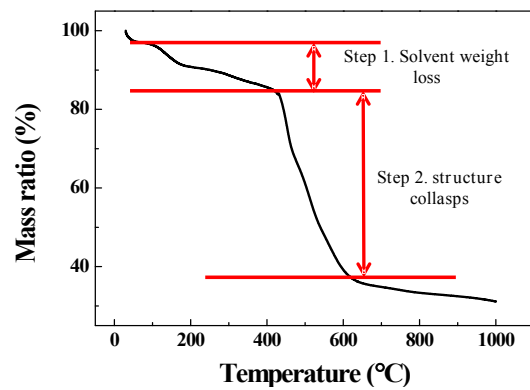

**Fig. S8** TGA curves of as-prepared F-CTF-3.

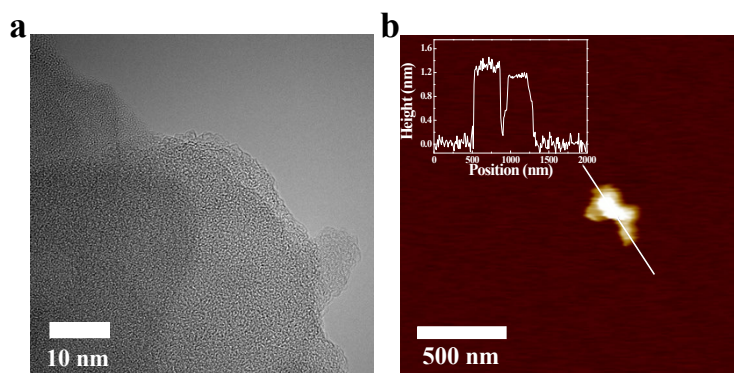

**Fig. S9** (a). High-resolution TEM image of F-CTF-3. (b). AFM image and height profile of F-CTF-3.

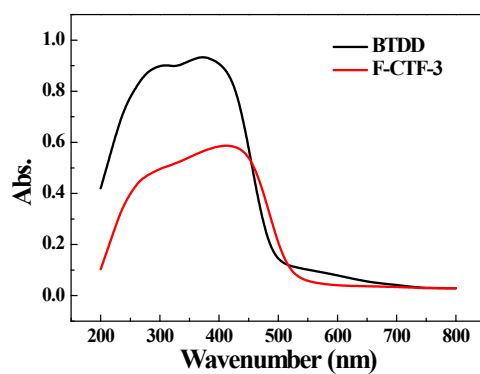

**Fig. S10** Solid-state UV spectra of BTDD and F-CTF-3 excited at 372 nm and 412 nm, respectively.

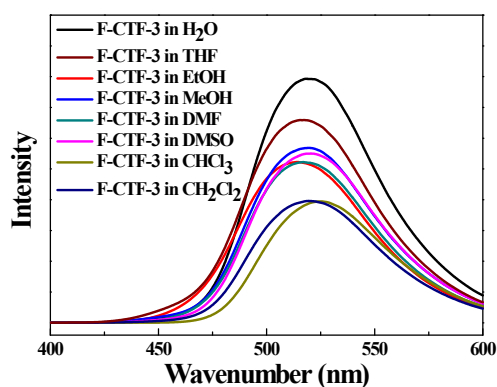

**Fig. S11** Photoluminescent spectra of F-CTF-3 dispersed in different solvents excited at 416 nm in room temperature.

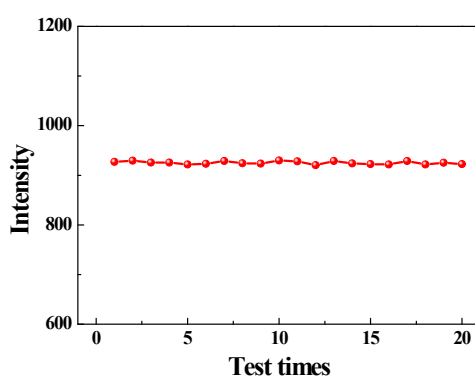

**Fig. S12** Stability test for the fluorescence intensity of F-CTF-3 in water at room temperature.

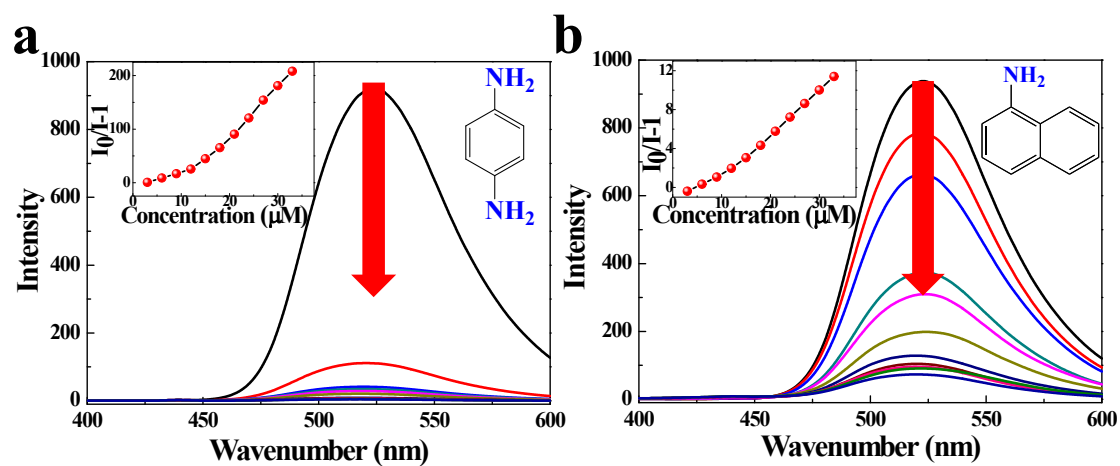

**Fig. S13** The emission spectra of F-CTF-3 dispersed in water upon the increased addition of 200  $\mu$ L (3  $\mu$ M, 20  $\mu$ L addition each time) aqueous solution of (a) PDA and (b) NPA at room temperature, respectively.

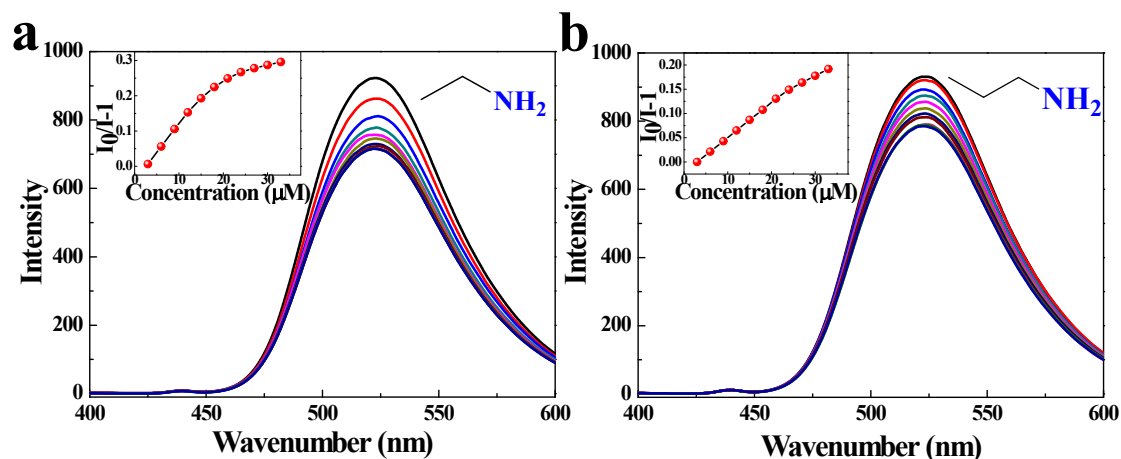

**Fig. S14** The emission spectra of F-CTF-3 dispersed in water upon the increased addition of 200  $\mu\text{L}$  (3  $\mu\text{M}$ , 20  $\mu\text{L}$  addition each time) aqueous solution of (a) EA and (b) PPA at room temperature, respectively.

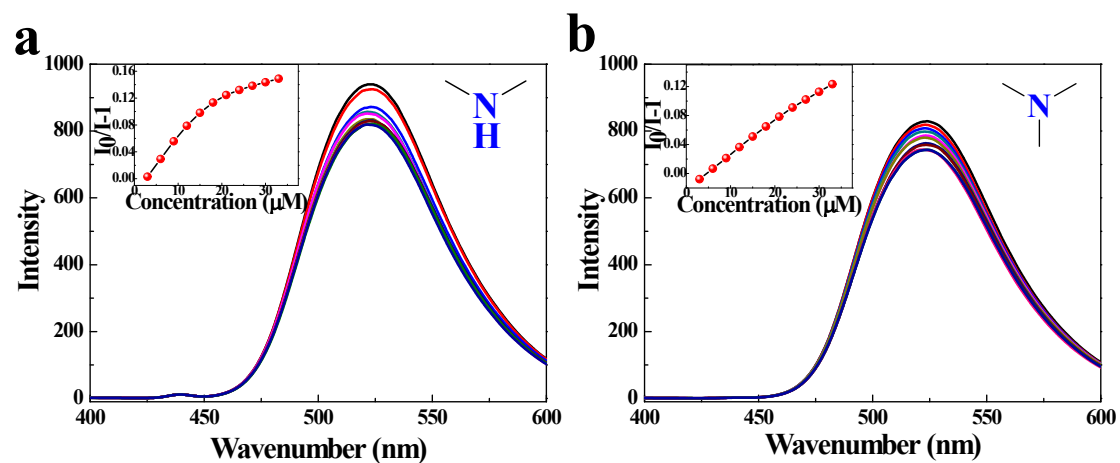

**Fig. S15** The emission spectra of F-CTF-3 dispersed in water upon the increased addition of 200  $\mu\text{L}$  (3  $\mu\text{M}$ , 20  $\mu\text{L}$  addition each time) aqueous solution of (a) DMA and (b) TMA at room temperature, respectively.

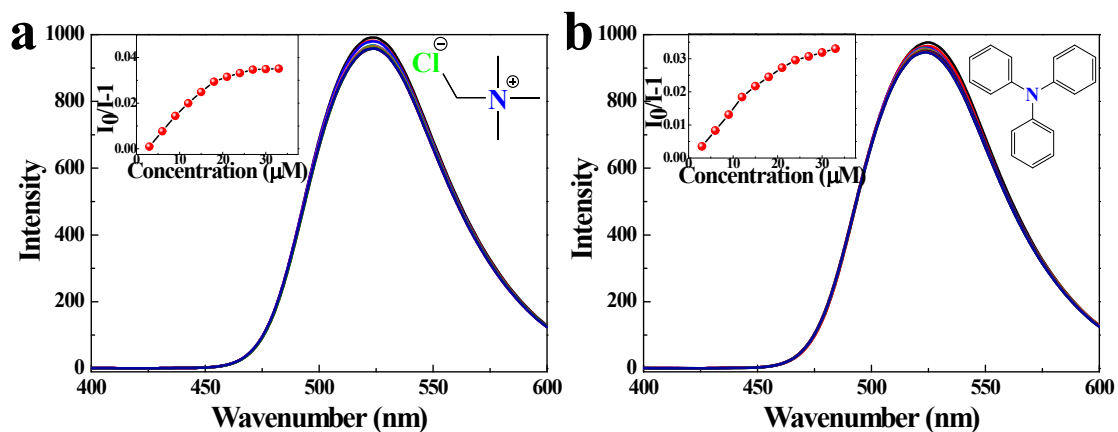

**Fig. S16** The emission spectra of F-CTF-3 dispersed in water upon the increased addition of 200  $\mu\text{L}$  (3  $\mu\text{M}$ , 20  $\mu\text{L}$  addition each time) aqueous solution of (a) TMAC and (b) TPA at room temperature, respectively.

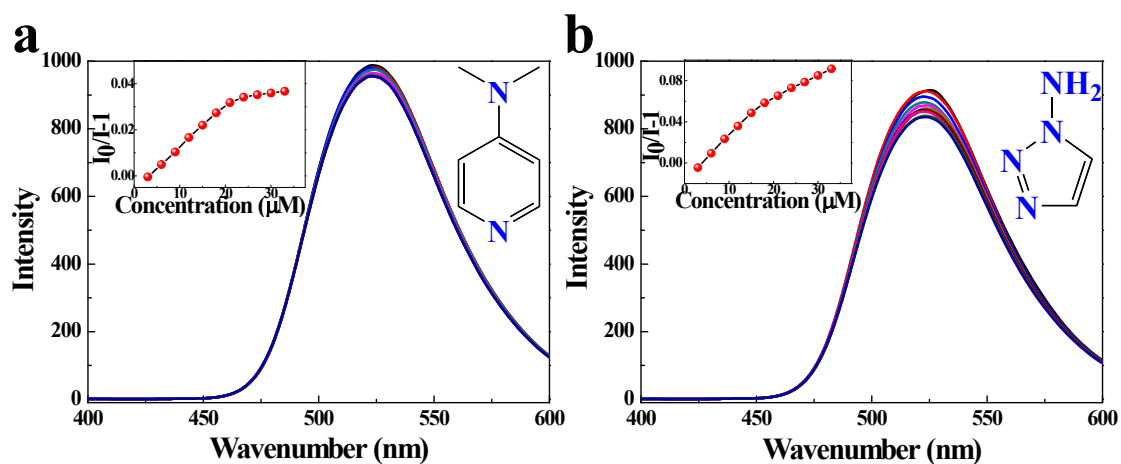

**Fig. S17** The emission spectra of F-CTF-3 dispersed in water upon the increased addition of 200  $\mu\text{L}$  (3  $\mu\text{M}$ , 20  $\mu\text{L}$  addition each time) aqueous solution of (a) DMAP and (b) ATL at room temperature, respectively.

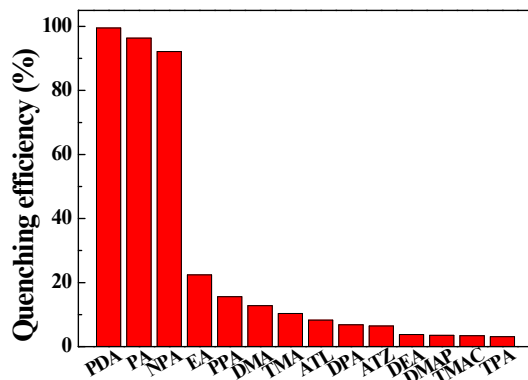

**Fig. S18** Fluorescence quenching efficiencies of F-CTF-3 by different analytes at room temperature.

**Table S1** The quenching constants ( $K_{sv}$ ) and limit of detection (LOD) of F-CTF-3 for sensing different analytes at room temperature.

| analytes | $K_{sv}$ (F-CTF-3)/M <sup>-1</sup> | LOD (F-CTF-3)/ $\mu$ M |
|----------|------------------------------------|------------------------|
| PDA      | $6.36 \times 10^6$                 | $1.47 \times 10^{-3}$  |
| PA       | $8.01 \times 10^5$                 | $1.17 \times 10^{-2}$  |
| NPA      | $3.57 \times 10^5$                 | $2.62 \times 10^{-2}$  |
| EA       | $8.76 \times 10^3$                 | 1.07                   |
| PPA      | $5.59 \times 10^3$                 | 1.67                   |
| DMA      | $4.44 \times 10^3$                 | 2.10                   |
| TMA      | $3.50 \times 10^3$                 | 2.67                   |
| ATL      | $2.74 \times 10^3$                 | 3.41                   |
| DPA      | $2.23 \times 10^3$                 | 4.20                   |
| ATZ      | $2.08 \times 10^3$                 | 4.48                   |
| DEA      | $1.19 \times 10^3$                 | 7.84                   |
| DMAP     | $1.11 \times 10^3$                 | 8.39                   |
| TMAC     | $1.07 \times 10^3$                 | 8.76                   |

**Table S2** The Stern-Volmer constant ( $K_{sv}$ ) and limit of detection (LOD) of F-CTF-3 for PA detection was compared with those of other materials.

| No. | Material               | Solvent/supported systems | LOD (nM) | Ref. |
|-----|------------------------|---------------------------|----------|------|
| 1   | FJU-10                 | DMF                       | 580      | 7    |
| 2   | dye@FJU-10             | DMF                       | 620      | 7    |
| 3   | Compound 4             | Water                     | 6800     | 8    |
| 4   | Compound 6             | Water                     | 9000     | 8    |
| 5   | LVMOF-1                | Water                     | 55       | 9    |
| 6   | DTPP                   | THF                       | 12.65    | 10   |
| 7   | PVDF-Embedded 1        | amine vapor               | 24       | 11   |
| 8   | phenoxyquinone 1       | Acetonitrile              | 1200     | 12   |
| 9   | EDMAYM                 | Acetonitrile              | 25000    | 13   |
| 10  | DSB-dialdehyde         | Water/THF (9:1)           | 3760     | 14   |
| 11  | HPQ-Ac                 | amine vapor               | 29000    | 15   |
| 12  | PFPE-COOH              | DMF                       | 90000    | 16   |
| 13  | Spiropyran derivatives | THF                       | 100      | 17   |
| 14  | BODIPY derivatives     | THF                       | 3060     | 18   |
| 15  | TPPA                   | amine vapor               | 3000000  | 19   |
| 16  | compounds 1            | DMF                       | 3060     | 20   |
| 17  | compounds 5            | DMF                       | 2290     | 20   |
| 18  | R6G@ZIF-8              | acetone                   | 5000000  | 21   |
| 19  | Film 1                 | amine vapor               | 161      | 22   |



|           |                                    |               |             |                         |
|-----------|------------------------------------|---------------|-------------|-------------------------|
| 20        | 8FP-2F                             | aniline vapor | 32.3        | 23                      |
| 21        | S-NG/GCE                           | water         | 23          | 24                      |
| 22        | DOF                                | amine vapor   | 142         | 25                      |
| 23        | TCbzBSF                            | amine vapor   | 60          | 26                      |
| 24        | CDs-silica aerogel                 | amine vapor   | 834408      | 27                      |
| 25        | Cellulose-based sensor Phen-MDI-CA | aniline       | 460         | 28                      |
| <b>26</b> | <b>F-CTF-3</b>                     | <b>water</b>  | <b>11.7</b> | <b><i>This work</i></b> |

**Table S3** The Stern-Volmer constant ( $K_{sv}$ ) and limit of detection (LOD) of F-CTF-3 for PDA detection was compared with those of other materials.

| No.       | Material       | Solvent/supported systems         | LOD (nM)    | Ref.                    |
|-----------|----------------|-----------------------------------|-------------|-------------------------|
| 1         | PFPE-COOH      | DMF                               | 89250       | 16                      |
| 2         | S-NG/GCE       | water                             | 51          | 24                      |
| 3         | BCP-Py-CHO     | water                             | 7           | 29                      |
| 4         | Py-CHO         | water                             | 9000        | 29                      |
| 5         | Gelator        | DMSO/H <sub>2</sub> O (10/1, v/v) | 90          | 30                      |
| 6         | ARS/4-FPBA     | water                             | 30000       | 31                      |
| 7         | CDs@NBD        | water                             | 56          | 32                      |
| 8         | GCE            | water                             | 163         | 33                      |
| 9         | DTAF           | water                             | 50          | 34                      |
| <b>10</b> | <b>F-CTF-3</b> | <b>water</b>                      | <b>1.47</b> | <b><i>This work</i></b> |

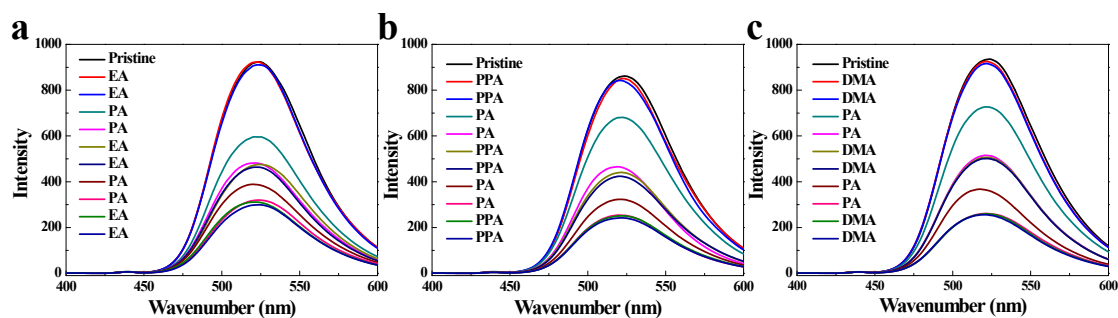

**Fig. S19** Tracked emission spectra of F-CTF-3 upon the addition of a saturated aqueous solution of (a) EA, (b) PPA and (c) DMA followed by 3  $\mu\text{M}$  aqueous solution of PA at room temperature, respectively (20  $\mu\text{L}$  addition each time).

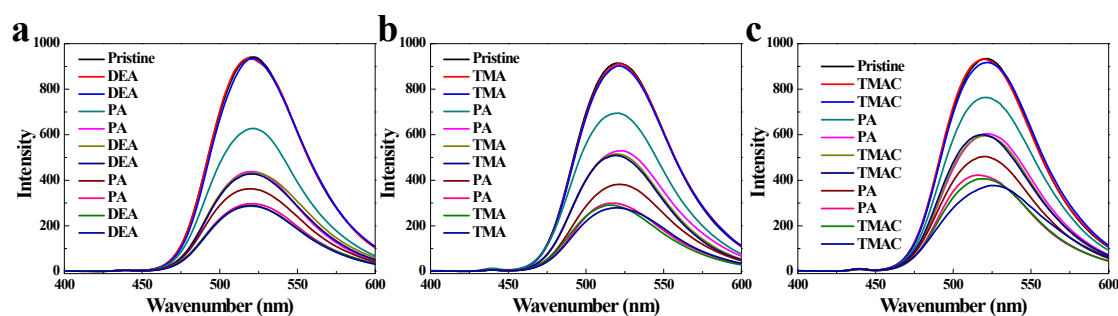

**Fig. S20** Tracked emission spectra of F-CTF-3 upon the addition of a saturated aqueous solution of (a) DEA, (b) TMA and (c) TMAC followed by 3  $\mu\text{M}$  aqueous solution of PA at room temperature, respectively (20  $\mu\text{L}$  addition each time).

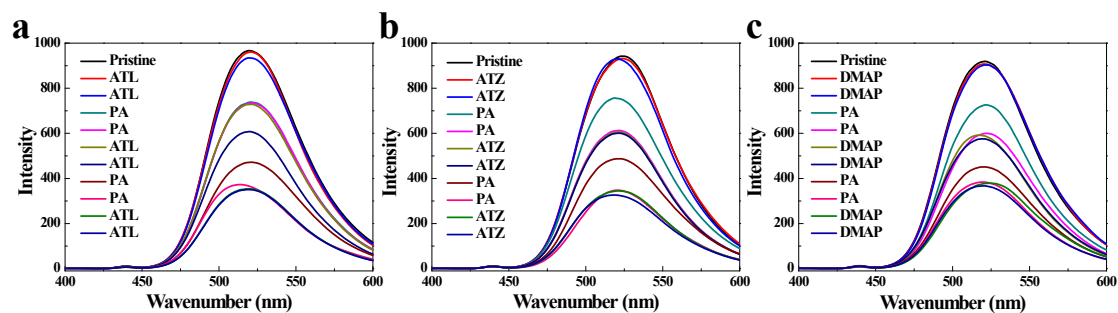

**Fig. S21** Tracked emission spectra of F-CTF-3 upon the addition of a saturated aqueous solution of (a) ATL, (b) ATZ and (c) DMAP followed by 3  $\mu\text{M}$  aqueous solution of PA at room temperature, respectively (20  $\mu\text{L}$  addition each time).

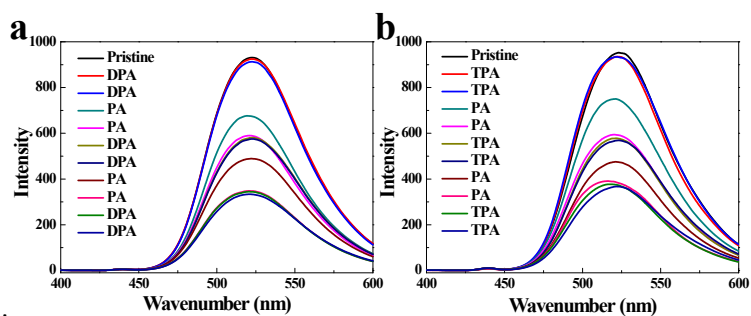

**Fig. S22** Tracked emission spectra of F-CTF-3 upon the addition of a saturated aqueous solution of (a) DPA and (c) TPA followed by 3  $\mu\text{M}$  aqueous solution of PA at room temperature, respectively (20  $\mu\text{L}$  addition each time).

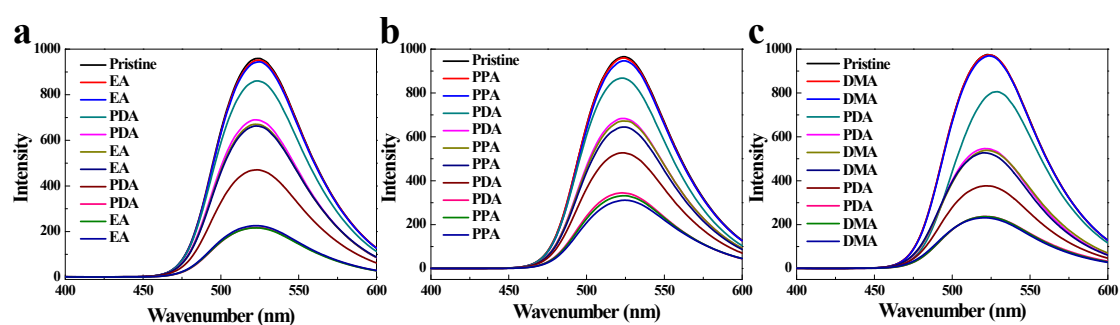

**Fig. S23** Tracked emission spectra of F-CTF-3 upon the addition of a saturated aqueous solution of (a) EA, (b) PPA and (c) DMA followed by 3  $\mu\text{M}$  aqueous solution of PDA at room temperature, respectively (20  $\mu\text{L}$  addition each time).

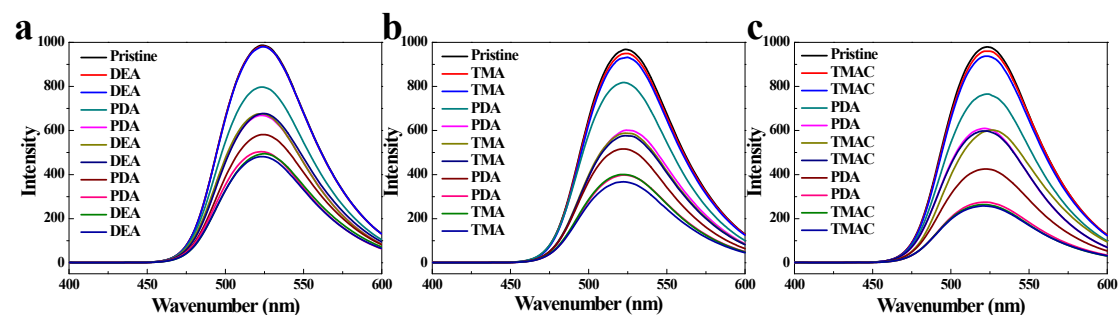

**Fig. S24** Tracked emission spectra of F-CTF-3 upon the addition of a saturated aqueous solution of (a) DEA, (b) TMA and (c) TMAC followed by 3  $\mu\text{M}$  aqueous solution of PDA at room temperature, respectively (20  $\mu\text{L}$  addition each time).

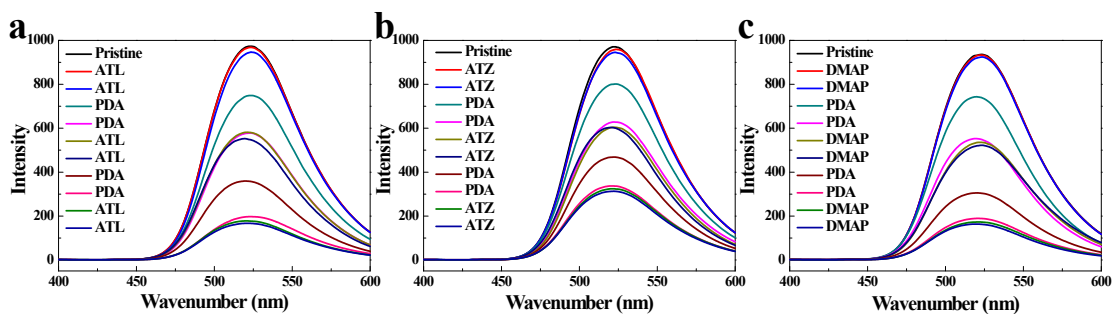

**Fig. S25** Tracked emission spectra of F-CTF-3 upon the addition of a saturated aqueous solution of (a) ATL, (b) ATZ and (c) DMAP followed by 3  $\mu\text{M}$  aqueous solution of PDA at room temperature, respectively (20  $\mu\text{L}$  addition each time).

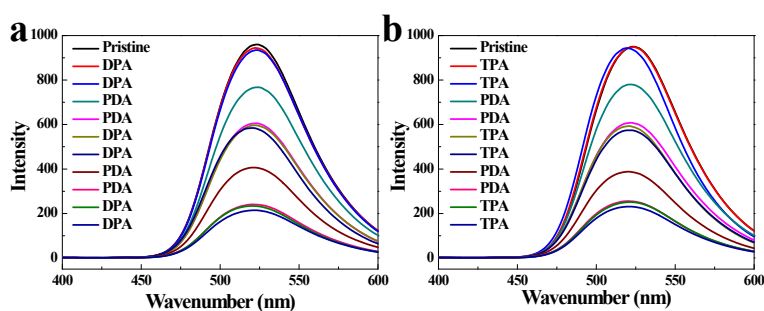

**Fig. S26** Tracked emission spectra of F-CTF-3 upon the addition of a saturated aqueous solution of (a) DPA and (c) TPA followed by 3  $\mu\text{M}$  aqueous solution of PDA at room temperature, respectively (20  $\mu\text{L}$  addition each time).

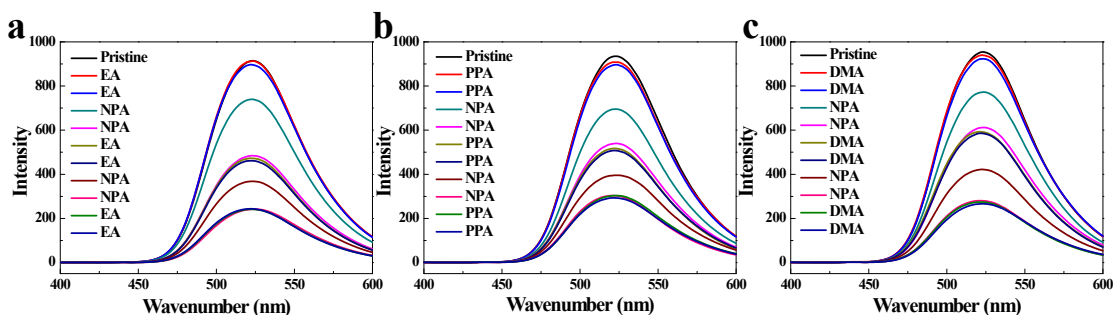

**Fig. S27** Tracked emission spectra of F-CTF-3 upon the addition of a saturated aqueous solution of (a) EA, (b) PPA and (c) DMA followed by 3  $\mu\text{M}$  aqueous solution of NPA at room temperature, respectively (20  $\mu\text{L}$  addition each time).

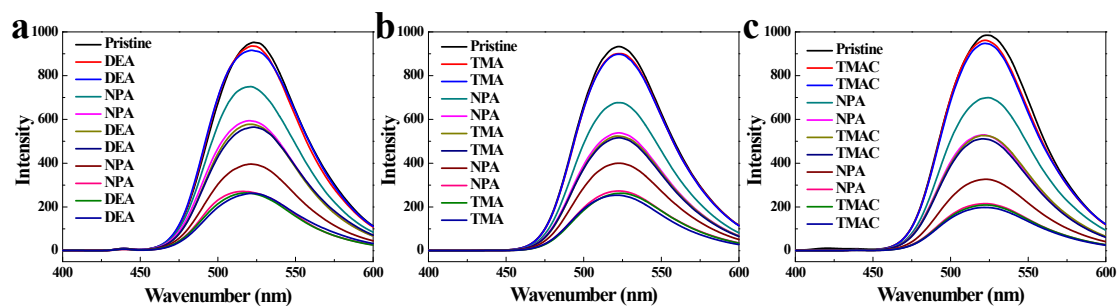

**Fig. S28** Tracked emission spectra of F-CTF-3 upon the addition of a saturated aqueous solution of (a) DEA, (b) TMA and (c) TMAC followed by 3  $\mu\text{M}$  aqueous solution of NPA at room temperature, respectively (20  $\mu\text{L}$  addition each time).

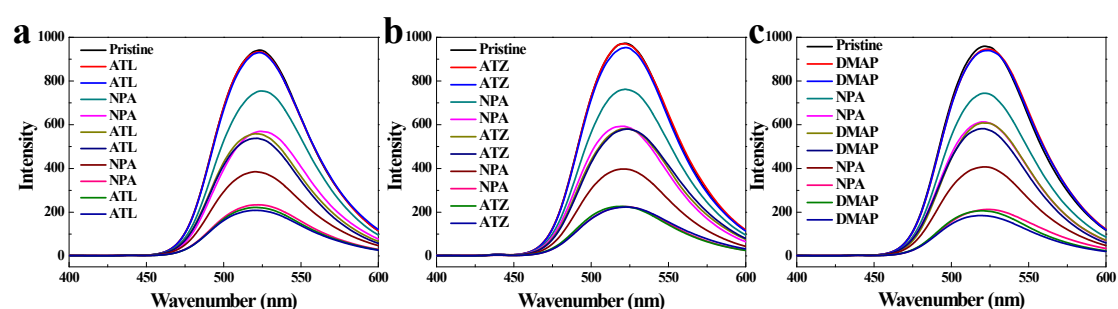

**Fig. S29** Tracked emission spectra of F-CTF-3 upon the addition of a saturated aqueous solution of (a) ATL, (b) ATZ and (c) DMAP followed by 3  $\mu\text{M}$  aqueous solution of NPA at room temperature, respectively (20  $\mu\text{L}$  addition each time).

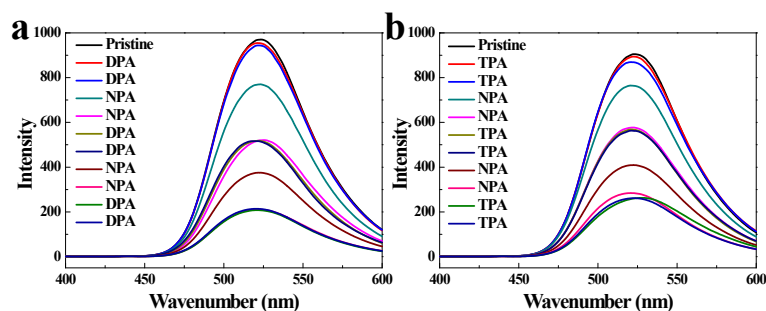

**Fig. S30** Tracked emission spectra of F-CTF-3 upon the addition of a saturated aqueous solution of (a) DPA and (c) TPA followed by 3  $\mu\text{M}$  aqueous solution of NPA at room temperature, respectively (20  $\mu\text{L}$  addition each time).

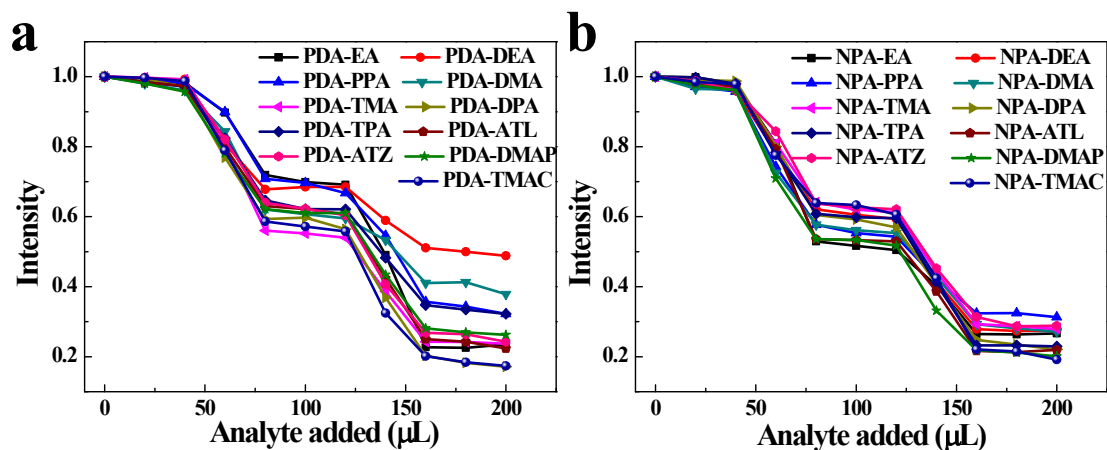

**Fig. S31** Selective detection of (a) PDA and (b) NPA on F-CTF-3 in the presence of the other non-PAA in water at room temperature.

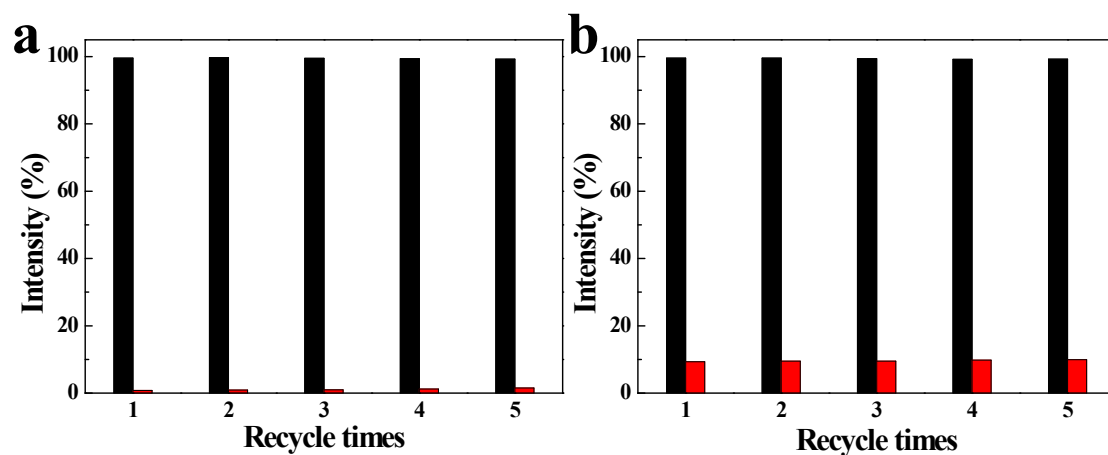

**Fig. S32** The recycle stability F-CTF-3 for (a) PDA and (b) NPA detection at room temperature. (The black bars represent the initial fluorescence intensity and the red bars represent the intensity upon addition a solution of 2 mL 30  $\mu$ M analyte PDA or NPA in water).

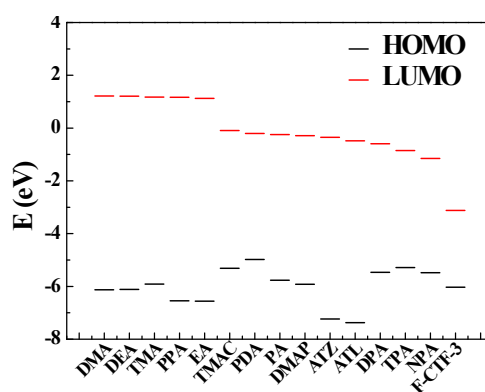

**Fig. S33** (b) HOMO and LUMO energies for selected analytes and F-CTF-3 arranged in decreased order of LUMO energies.

**Table S4** HOMO and LUMO energies calculated for selected analytes and F-CTF-3 used at B3LYP/6-31G\* level.

| <b>Analytes</b> | <b>HUMO (ev)</b> | <b>LUMO (ev)</b> | <b>Band Gap (ev)</b> |
|-----------------|------------------|------------------|----------------------|
| <b>DMA</b>      | -6.12801         | 1.21281          | 7.34082              |
| <b>DEA</b>      | -6.11712         | 1.20683          | 7.32395              |
| <b>TMA</b>      | -5.91304         | 1.17199          | 7.08503              |
| <b>PPA</b>      | -6.54706         | 1.16601          | 7.71307              |
| <b>EA</b>       | -6.55604         | 1.12546          | 7.6815               |
| <b>TMAC</b>     | -5.30976         | -0.09034         | 5.21942              |
| <b>PDA</b>      | -4.98186         | -0.2049          | 4.77696              |
| <b>PA</b>       | -5.76555         | -0.24871         | 5.51684              |
| <b>DMAP</b>     | -5.91576         | -0.28953         | 5.62623              |
| <b>ATZ</b>      | -7.23333         | -0.3532          | 6.88013              |
| <b>ATL</b>      | -7.37157         | -0.48083         | 6.89074              |
| <b>DPA</b>      | -5.46405         | -0.59539         | 4.86866              |
| <b>TPA</b>      | -5.28799         | -0.85281         | 4.43518              |
| <b>NPA</b>      | -5.47711         | -1.15295         | 4.32416              |
| <b>F-CTF-3</b>  | -6.027           | -3.123           | 2.904                |

**Table S5.** Stern–Volmer quenching constants and bimolecular quenching constant for the interaction of F-CTF-3 and different analytes.

| Analyte | $K_{sv}$ ( $M^{-1}$ ) ( $0^{\circ}C$ ) | $K_{sv}$ ( $M^{-1}$ ) ( $25^{\circ}C$ ) | $K_q$ (mol/s)         |
|---------|----------------------------------------|-----------------------------------------|-----------------------|
| PDA     | $2.62 \times 10^7$                     | $6.36 \times 10^6$                      | $3.81 \times 10^{15}$ |
| PA      | $1.82 \times 10^6$                     | $8.01 \times 10^5$                      | $4.80 \times 10^{14}$ |
| NPA     | $8.33 \times 10^5$                     | $3.57 \times 10^5$                      | $2.14 \times 10^{14}$ |

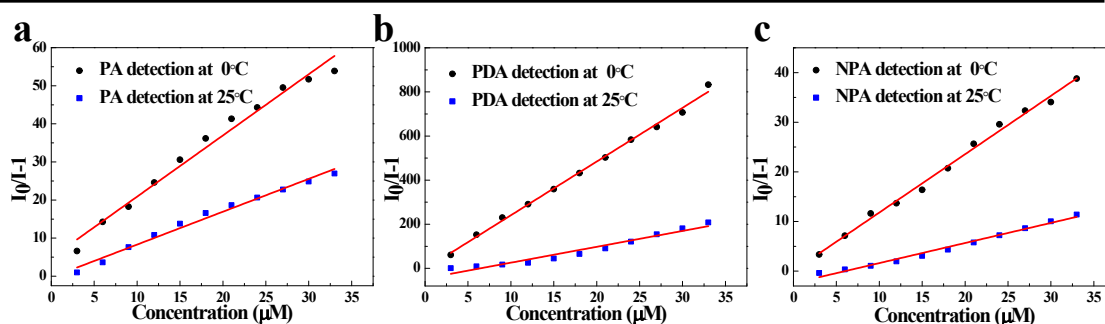

**Fig. S34** The SV plots of the selected PAAs (a. PA, b. PDA and c. NPA) (3  $\mu M$ , 20  $\mu L$  each time) in F-CTF-3 suspension solution at different temperature.

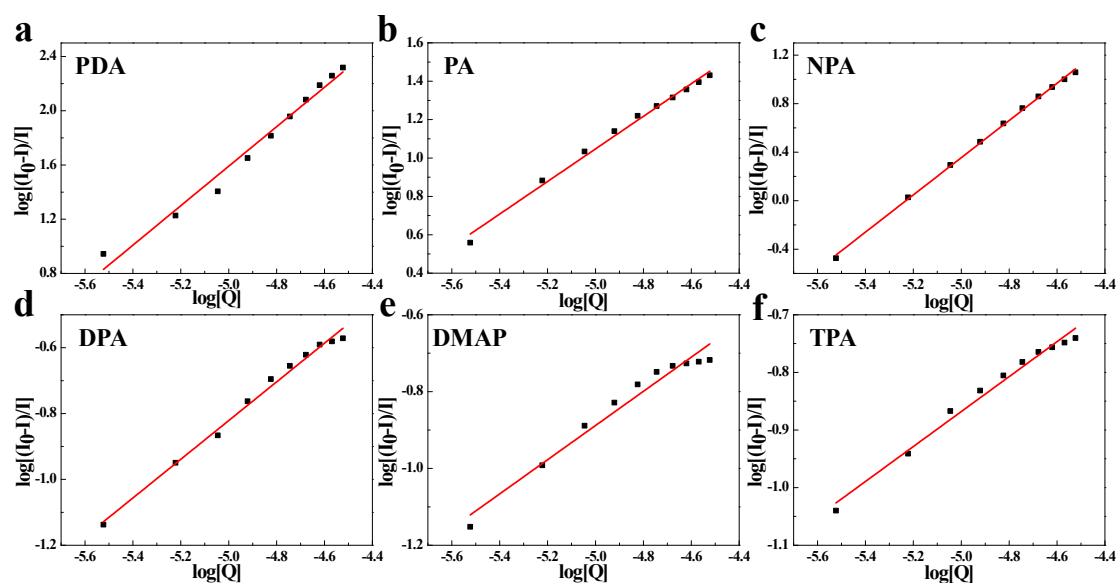

**Fig. S35** Plot of  $\log[(I_0-I)/I]$  versus  $\log[Q]$  for the interaction of (a) PDA, (b) PA, (c) NPA, (d) DPA, (e) DMAP and (f) TPA with F-CTF-3 in aqueous solution.



**Table. S6** binding parameters for the interaction of F-CTF-3 and different analytes.

| Analyte | $K_b$ (L/mol)      | n    |
|---------|--------------------|------|
| PDA     | $7.45 \times 10^8$ | 1.54 |
| PA      | $1.06 \times 10^7$ | 1.46 |
| NPA     | $1.95 \times 10^6$ | 1.08 |
| DPA     | $1.31 \times 10^2$ | 0.59 |
| DMAP    | $2.17 \times 10^1$ | 0.45 |
| TPA     | $4.45 \times 10^0$ | 0.31 |

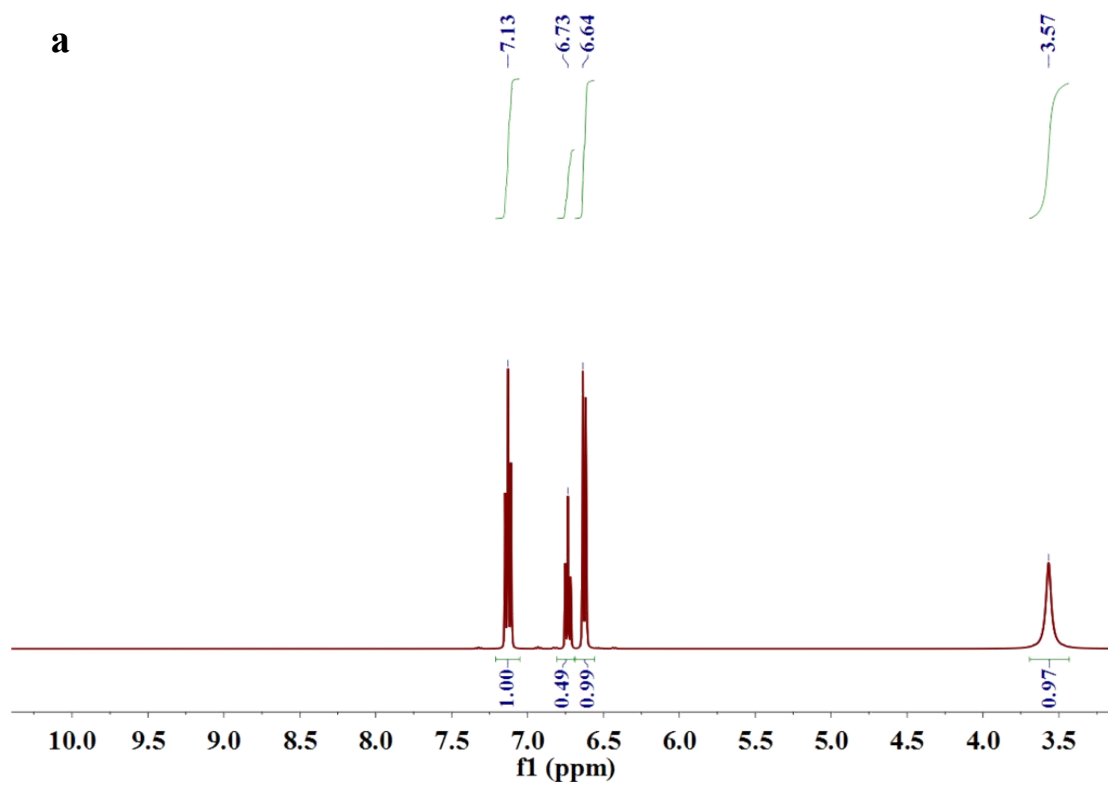

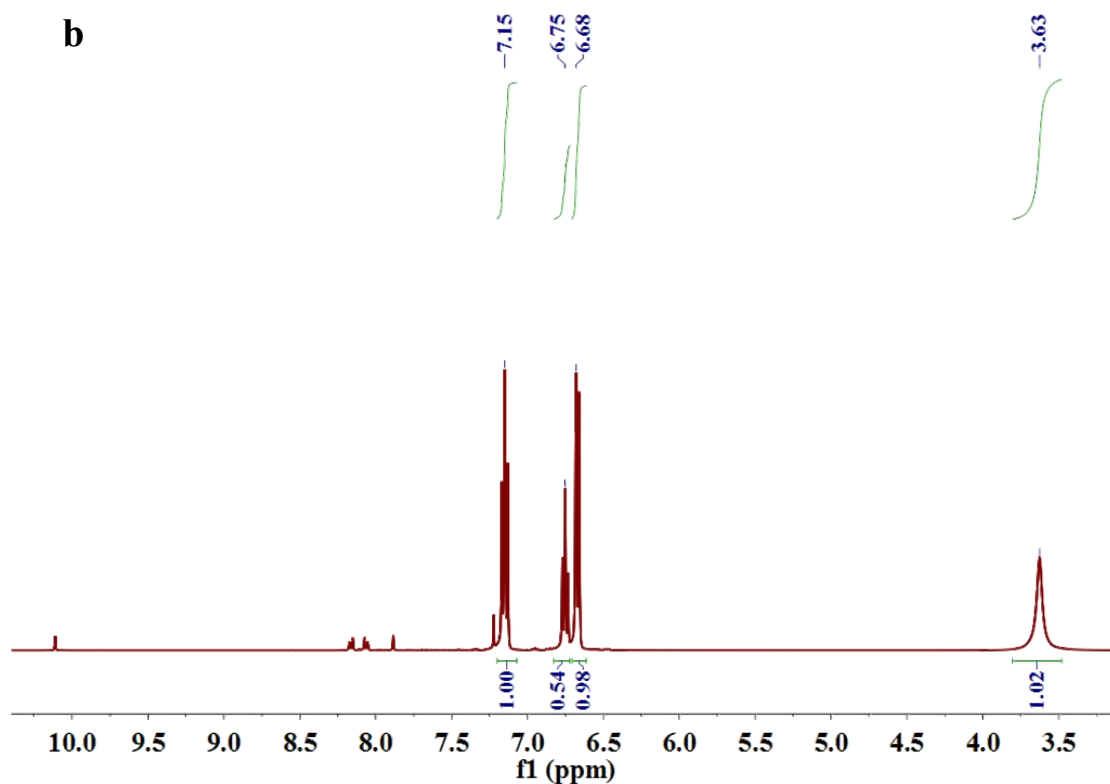

**Fig. S36.**  $^1\text{H}$  NMR spectra of (a) PA and (a) PA@BTDD.

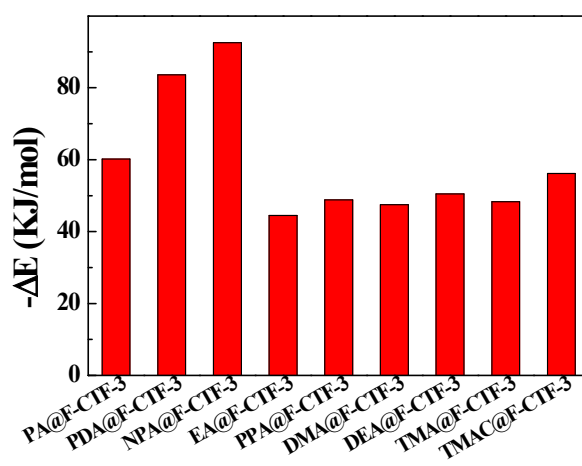

**Fig. S37** The binding energies of PAAs and various aliphatic amines on F-CTF-3.

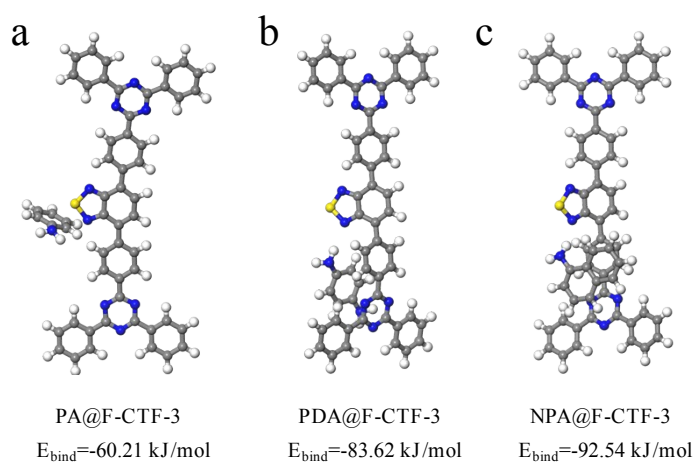

**Fig. S38** Optimized geometries for the interactions of F-CTF-3 with (a) PA, (b) PDA and (c) NPA. Color code: C, gray; H, white; N, blue; S, yellow.

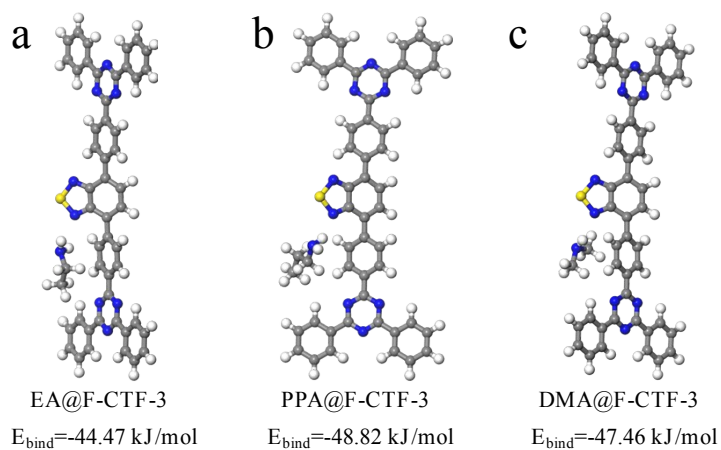

**Fig. S39** Optimized geometries for the interactions of F-CTF-3 with (a) EA, (b) PPA and (c) DMA. Color code: C, gray; H, white; N, blue; S, yellow.

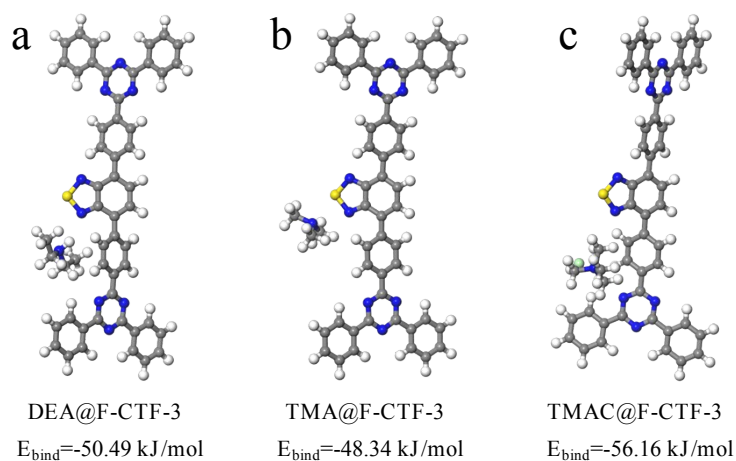

**Fig. S40** Optimized geometries for the interactions of F-CTF-3 with (a) DEA, (b) TMA and (c) TMAC. Color code: C, gray; H, white; N, blue; S, yellow; Cl, reseda.

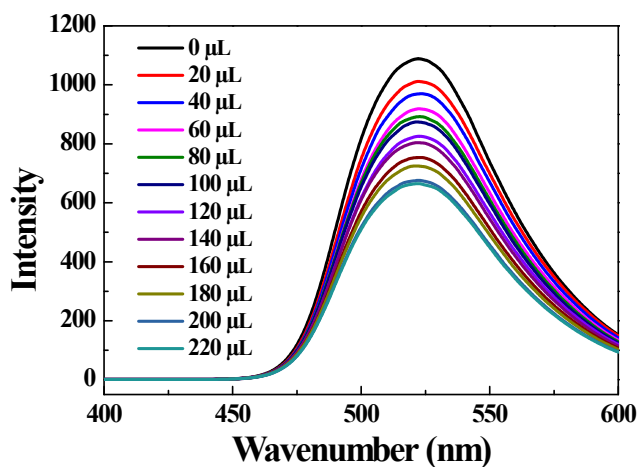

**Fig. S41** The emission spectra of F-CTF-3 dispersed in water upon incremental addition of triaminobenzene (TAB) (3  $\mu\text{M}$ , 20  $\mu\text{L}$  addition each time). The TAB solution was neutralized with NaOH before fluorescence detection experiments.

**Table S7.** The quenching constants ( $K_{sv}$ ) and limit of detection (LOD) of F-CTF-3 for sensing different analytes at room temperature.

| analytes         | $K_{sv}$ (F-CTF-3)/M <sup>-1</sup> | LOD (F-CTF-3)/ $\mu$ M |
|------------------|------------------------------------|------------------------|
| PDA              | $6.36 \times 10^6$                 | $1.47 \times 10^{-3}$  |
| PA               | $8.01 \times 10^5$                 | $1.17 \times 10^{-2}$  |
| NPA              | $3.57 \times 10^5$                 | $2.62 \times 10^{-2}$  |
| TAB <sup>a</sup> | $2.13 \times 10^4$                 | $4.40 \times 10^{-1}$  |

<sup>a</sup> TAB solution was neutralized before the fluorescence quenching experiment.

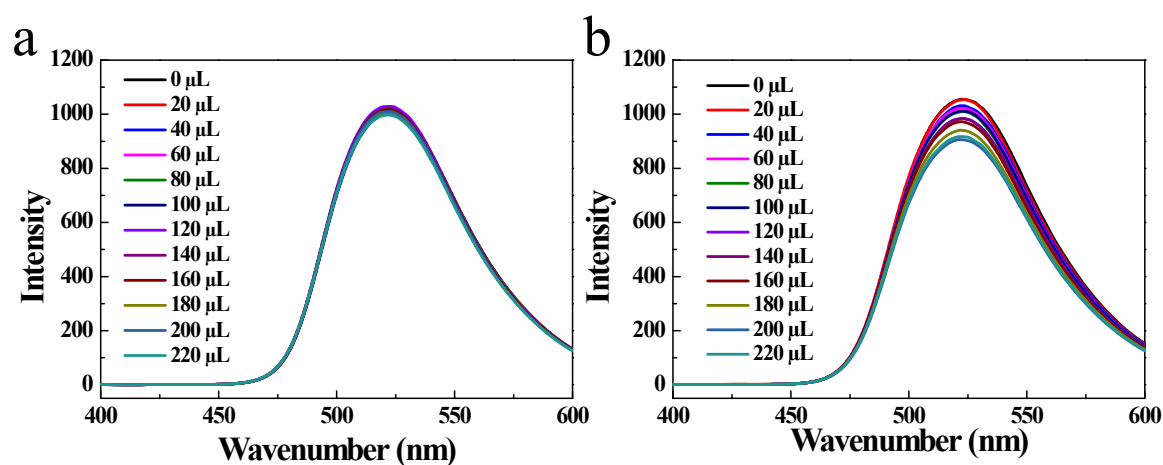

**Fig. S42** The emission spectra of F-CTF-3 dispersed in water upon incremental addition of (a) PA and (b) TAB in pH=1 aqueous solution (3  $\mu$ M, 20  $\mu$ L addition each time).

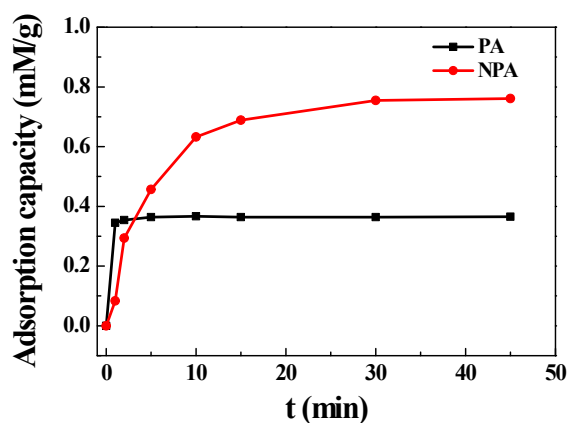

**Fig. S43** Adsorption kinetics of F-CTF-3 after adsorbed PA and NPA. (The initial concentration is 0.5 mM)

#### The adsorption dates fitting by kinetic models

In order to get more information about sorption process, the experimental dates were fitted with the pseudo-first-order kinetic model and the pseudo-second-order kinetic model. Two models are expressed as follows.

The pseudo-first-order equation:

$$\ln(Q_e - Q_t) = \ln Q_e - k_1 t$$

The pseudo-second-order equation:

$$\frac{t}{Q_t} = \frac{1}{k_2 Q_e^2} + \frac{t}{Q_e}$$

Where  $Q_t$  ( $\text{mM g}^{-1}$ ) and  $Q_e$  ( $\text{mM g}^{-1}$ ) are sorption quantity of PA and NPA at time  $t$  and at equilibrium,  $K_1$  ( $\text{min}^{-1}$ ) and  $K_2$  ( $\text{g mM}^{-1}\text{min}^{-1}$ ) are the pseudo-first-order and pseudo-second-order equation rate constants. The plots of  $\ln(Q_e - Q_t)$  versus  $t$  and  $t/Q_t$  versus  $t$  are shown in Fig. S44.

The model parameters and the correlation coefficients are listed in Table S8.

**Table S8** The kinetic parameters for the PA and NPA adsorption on F-CTF-3.

|             | pseudo-first-order kinetic |                        |         | pseudo-second-order kinetic |                                         |         |
|-------------|----------------------------|------------------------|---------|-----------------------------|-----------------------------------------|---------|
|             | model                      |                        |         | model                       |                                         |         |
|             | $Q_e(\text{mM g}^{-1})$    | $k_1(\text{min}^{-1})$ | $R_2$   | $Q_e(\text{mM g}^{-1})$     | $k_2(\text{g mM}^{-1} \text{min}^{-1})$ | $R_2$   |
| F-CTF-3-PA  | 0.2430                     | 0.74799                | 0.80585 | 0.3694                      | 34.53457                                | 0.99999 |
| F-CTF-3-NPA | 0.6252                     | 0.10829                | 0.95215 | 0.8561                      | 0.30048                                 | 0.99997 |

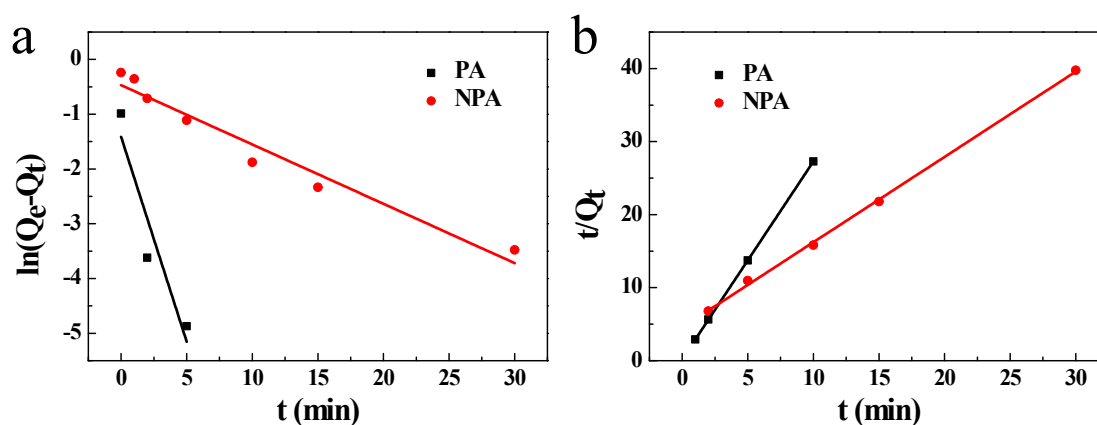

**Fig. S44** The pseudo-first-order kinetic model (a) and pseudo-second-order kinetic model (b) linearized plots for PA and NPA adsorption on F-CTF-3.

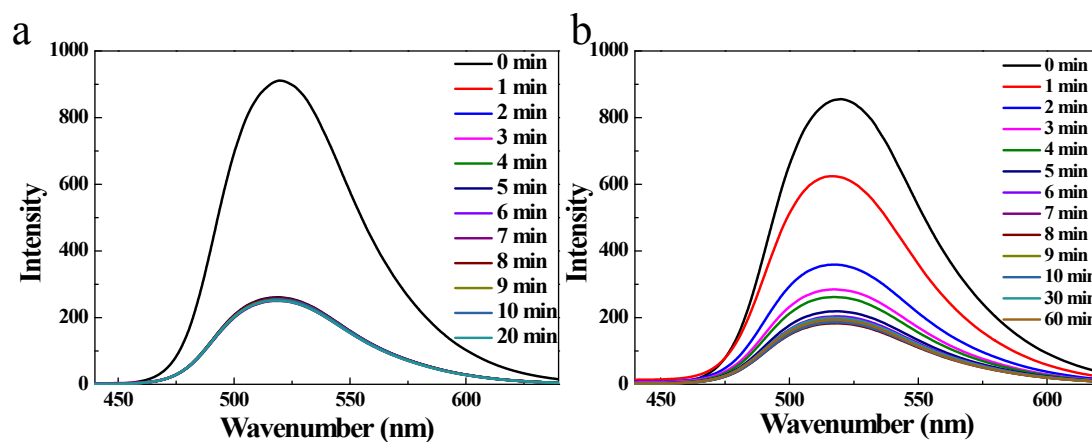

**Fig. S45** The emission spectra of F-CTF-3 dispersed in water after adding (a) PA and (b) NPA solution with the increasingly time.

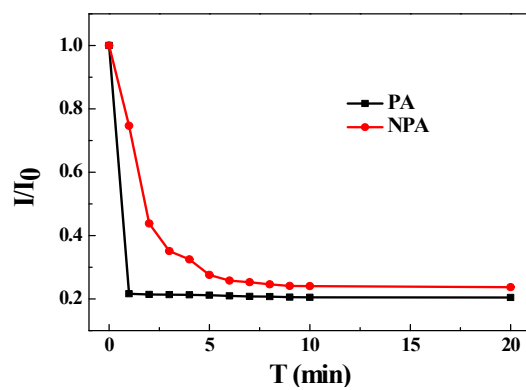

**Fig. S46** The time-depended emission spectra intensity of F-CTF-3 suspension towards (a) PA and (b) NPA.

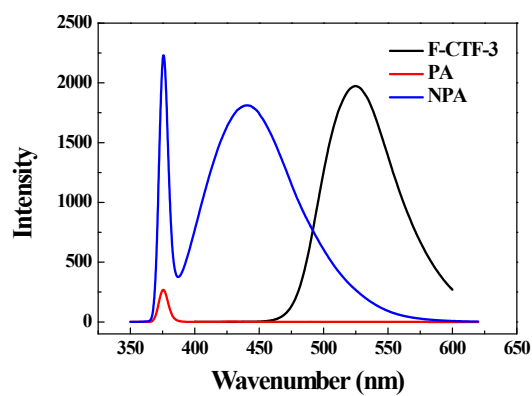

**Fig. S47** The emission spectra of PA, NPA and F-CTF-3 dispersed in water system.



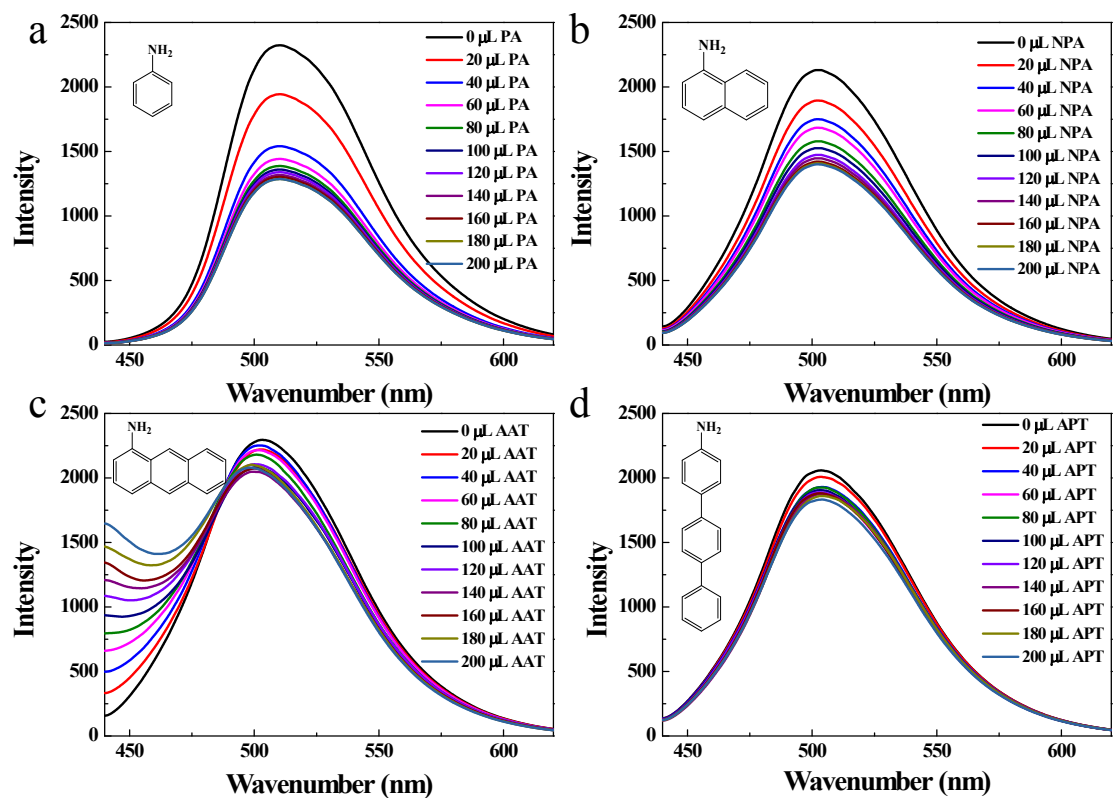

**Fig. S48** The emission spectra of F-CTF-3 dispersed in DMF system upon incremental addition of four amines (a. PA, b. NPA, c. AAT and d. APT) (3  $\mu\text{M}$ , 20  $\mu\text{L}$  each time).

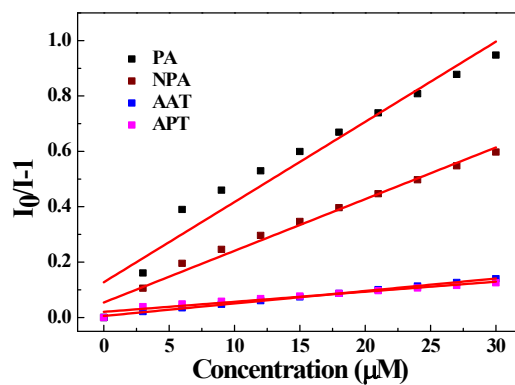

**Fig. S49** The SV plots of the selected amines (PA, NPA, AAT and APT) (3 µM, 20 µL each time) in F-CTF-3 suspension solution.

**Table S9** The quenching constants ( $K_{sv}$ ) of F-CTF-3 for sensing different molecule size analytes.

| analytes | $K_{sv}$ (F-CTF-3)/M <sup>-1</sup> |
|----------|------------------------------------|
| PA       | $2.69 \times 10^4$                 |
| NPA      | $1.74 \times 10^4$                 |
| AAT      | $4.22 \times 10^3$                 |
| APT      | $4.13 \times 10^3$                 |

## References

- [1] Y. Z. Tang, H. L. Huang, W. J. Xue, Y. J. Chang, Y. Li, X. Y. Guo, C. L. Zhong, Rigidifying induced fluorescence enhancement in 2D porous covalent triazine framework nanosheets for the simultaneously luminous detection and adsorption removal of antibiotics, *Chem. Eng. J.*, 2020, 384,123382.
- [2] M. Y. Liu, Q. Huang, S. L. Wang, Z. Y. Li, B. Y. Li, S. B. Jin and B. E. Tan, *Angew. Chem. Int. Ed.*, **2018**, 130, 12144-12148.
- [3] W. J. Luo, Y. X. Zhu, J. Y. Zhang, J. J. He, Z. G. Chi, P. W. Miller, L. P. Chen and C. Y. Su, *Chem. Commun.*, 2014, **50**, 11942-11945.
- [4] J. N. Hao and B. Yan, *Chem. Commun.*, 2015, **51**, 7737-7740.
- [5] P. Mandal, D. Sahoo, P. Sarkar, K. Chakraborty and S. Das, Fluorescence turn-on and turn-off sensing of pesticides by carbon dot-based sensor, *New J. Chem.*, **2019**, 43, 12137-12151.
- [6] Y. Li, F. Gao, F. Gao, F. Shan, J. Bian, C. Zhao, Study on the Interaction between 3 Flavonoid Compounds and  $\alpha$ -Amylase by Fluorescence Spectroscopy and Enzymatic Kinetics, *J. Food. Sci.*, **2009**, 74, 199-203.
- [7] L. Z. Liu, Z. Z. Yao, Y. X. Ye, C. L. Liu, Q. J. Lin, S. M. Chen, S. C. Xiang, Z. J. Zhang, Enhancement of Intrinsic Proton Conductivity and Aniline Sensitivity by Introducing Dye Molecules into the MOF Channel, *ACS Appl. Mater. Interfaces*, **2019**, 11, 16490–16495.
- [8] H. J. Feng, L. Xua, B. Liu, H. Jiao, Europium Metal-Organic Frameworks as Recyclable and Selective Turn-off Fluorescence Sensors for Aniline Detection, *Dalton Trans.*, **2016**, 45, 17392-17400.
- [9] T. Gong, P. Li, Q. Sui, J. Q. Chen, J. H. Xu, E. Q. Gao, Stable electron-deficient metal-organic framework for colorimetric and luminescent sensing of phenols and anilines, *J. Mater. Chem. A*, **2018**, 6, 9236-9244.
- [10] U. Balijapalli, S. Manickam, K. Thirumoorthy, K. N. Sundaramurthy, K. I. Sathiyarayanan, (Tetrahydrodibenzo[*a,i*]phenanthridin-5-yl)phenol as a Fluorescent Probe for the Detection of Aniline, *J. Org. Chem.*, **2019**, 84, 11513–11523.
- [11] B. P. Jiang, D. S. Guo, Y. Liu, Reversible and Selective Sensing of Aniline Vapor by Perylene-Bridged Bis(cyclodextrins) Assembly, *J. Org. Chem.*, **2011**, 76, 6101–6107.
- [12] I. S. Park, E. Heo, Y. S. Nam, C. W. Lee, J. M. Kim, Colorimetric detection of aliphatic primary amines and a molecular logic gate based on a photochromic phenoxyquinone derivative, *J. Photoch. Photobio. A*, **2012**, 238, 1–6.

- [13] A. R. Longstreet, M. Jo, R. R. Chandler, K. Hanson, N. Zhan, J. J. Hrudka, H. Mattoussi, M. Shatruk, D. T. McQuade, Ylidenemalononitrile Enamines as Fluorescent “Turn-On” Indicators for Primary Amines, *J. Am. Chem. Soc.*, **2014**, *136*, 15493–15496.
- [14] J. Kumpf, S. T. Schwaebel, U. H. F. Bunz, Amine Detection with Distyrylbenzenedialdehyde-Based Knoevenagel Adducts, *J. Org. Chem.*, **2015**, *80*, 5159–5166.
- [15] M. Gao, S. W. Li, Y. H. Lin, Y. Geng, X. Ling, L. C. Wang, A. J. Qin, B. Z. Tang, Fluorescent Light-Up Detection of Amine Vapors Based on Aggregation-Induced Emission, *ACS Sens.*, **2016**, *1*, 179–184.
- [16] Y. J. Zhao, K. S. Miao, Z. T. Zhu, L. J. Fan, Fluorescence Quenching of a Conjugated Polymer by Synergistic Amine-Carboxylic Acid and  $\pi$ - $\pi$  Interactions for Selective Detection of Aromatic Amines in Aqueous Solution, *ACS Sens.*, **2017**, *2*, 842–847.
- [17] W. G. Tian, Y. N. Xue, J. T. Tian, P. Z. Gong, J. H. Dai, X. Wang, Z. B. Zhu, Colorimetric and fluorometric dual-mode detection of aniline pollutants based on spiropyran derivatives, *RSC Adv.*, **2016**, *6*, 83312–83320.
- [18] Y. Y. Fu, Q. G. He, D. F. Zhu, Y. R. Wang, Y. X. Gao, H. M. Cao, J. G. Cheng, A BODIPY dye as a reactive chromophoric/fluorogenic probe for selective and quick detection of vapors of secondary amines, *Chem. Commun.*, **2013**, *49*, 11266–11268.
- [19] T. Y. Han, J. W. Y. Lam, N. Zhao, M. Gao, Z. Y. Yang, E. G. Zhao, Y. P. Dong, B. Z. Tang, A fluorescence-switchable luminogen in the solid state: a sensitive and selective sensor for the fast “turn-on” detection of primary amine gas, *Chem. Commun.*, **2013**, *49*, 4848–4850.
- [20] J. F. Song, H. F. Wen, J. J. Luo, Y. Y. Jia, X. Y. Zhang, L. J. Su, R. S. Zhou, Five isomorphous lanthanide metal-organic frameworks constructed from 5-(3-carboxy-phenyl)-pyridine-2-carboxylic acid and oxalate: Synthesis, crystal structures and selective fluorescence sensing for aniline, *J. Solid State Chem.*, **2019**, *269*, 43–50.
- [21] T. T. Han, J. Yang, Y. Y. Liu, J. F. Ma, Rhodamine 6G loaded zeolitic imidazolate framework-8 (ZIF-8) nanocomposites for highly selective luminescent sensing of  $\text{Fe}^{3+}$ ,  $\text{Cr}^{6+}$  and aniline, *Micropor. Mesopor. Mat.*, **2016**, *228*, 275–288.
- [22] C. D. Shang, G. Wang, M. X. He, X. M. Chang, J. Y. Fan, K. Q. Liu, H. N. Peng, Y. Fang, A high performance fluorescent arylamine sensor toward lung cancer Sniffing, *Sensor Actuat. B-Chem.*, **2017**, *241*, 1316–1323.
- [23] Z. N. Jiao, Y. Zhang, W. Xu, X. T. Zhang, H. B. Jiang, P. C. Wu, Y. Y. Fu, Q. G. He, H. M. Cao, J. G. Cheng, Highly Efficient Multiple-Anchored Fluorescent Probe for the Detection of Aniline Vapor Based on Synergistic Effect: Chemical Reaction and PET, *ACS Sens.*, **2017**, *2*,

687–694.

[24] W. Q. Zhu, J. J. Gao, H. O. Song, X. Z. Lin, S. P. Zhang, Nature of synergistic effect of N and S co-doped graphene for enhanced simultaneous determination of toxic pollutants, *ACS Appl. Mater. Interfaces*, **2019**, *11*, 44545–44555.

[25] H. Su, R. Liu, M. L. Shu, M. Tang, J. Wang, H. J. Zhu, Fluorenone-based organogel and self-assembled fibrous film: Synthesis, optical properties and reversible detection of aniline vapor, *Dyes Pigments*, **2019**, *162*, 52–58.

[26] L. Zhai, Y. H. Shu, J. B. Sun, M. Sun, Y. Y. Song, R. Lu, Spirofluorene-Cored Difluoroboron  $\beta$ -Diketonate Complexes with Terminal Carbazole: Synthesis, Self-Assembling, and Fluorescent Sensory Properties, *Eur. J. Org. Chem.*, **2019**, 3093–3100.

[27] Y. S. Ma, X. Chen, J. L. Bai, G. J. Yuan, L. L. Ren, Highly selective fluorescence chemosensor based on carbon-dot-aerogel for detection of aniline gas, *Inorg. Chem. Commun.*, **2019**, *100*, 64–69.

[28] H. Nawaz, J. M. Zhang, W. G. Tian, K. F. Jin, R. N. Jia, T. T. Yang, J. Zhang, Cellulose-based fluorescent sensor for visual and versatile detection of amines and anions, *Journal of Hazardous Materials*, **2020**, *387*, 121719.

[29] L. F. Gao, X. Lin, X. Hai, X. W. Chen, J. H. Wang, Polymeric Ionic Liquid-Based Fluorescent Amphiphilic Block Copolymer Micelle for Selective and Sensitive Detection of *p*-Phenylenediamine, *ACS Appl. Mater. Interfaces*, **2018**, *10*, 43049–43056.

[30] X. H. Cao, N. Zhao, A. P. Gao, H. T. Lv, Y. L. Jia, R. M. Wu, Y. Q. Wu, Bis-naphthalimides self-assembly organogel formation and application in detection of *p*-phenylenediamine, *Mat. Sci. Eng. C*, **2017**, *70*, 216–222.

[31] K. Ngamdee, S. Martwiset, T. Tuntulani, W. Ngeontae, Selective fluorescence sensors for *p*-phenylenediamine using formyl boronate ester with an assistance of micelles, *Sensor. Actuat. B-Chem.*, **2012**, *173*, 682–691.

[32] W. J. Wang, J. M. Xia, X. Hai, M. L. Chen, J. H. Wang, A Hybrid of Carbon Dots with 4-Chloro-7-Nitro-1,2,3-Benzoxadiazole for Selective Detection of *p*-Phenylenediamine, *Environ. Sci.: Nano*, **2017**, *4*, 1037-1044.

[33] J. J. Gao, W. Q. Zhu, H. O. Song, S. P. Zhang, Highly-Sensitive Simultaneous Determination of *p*-Phenylenediamine and Hydroquinone by Recognizing Electrochemical Reduction Responses on Bare GCE, *J. Electrochem. Soc.*, **2019**, *166*, 35-41.

[34] H. Y. Ko, Y. H. Lin, C. J. Shih, Y. L. Chen, Determination of phenylenediamines in hair

colors derivatized with 5-(4,6-dichlorotriazinyl) aminofluorescein via micellar electrokinetic chromatography, *J. Food. Drug. Anal.*, **2019**, *27*, 825-831.
